# Supplementary material for: Transcription factor NF-kappa B represses ANT1 transcription and leads to mitochondrial dysfunctions
Source: PubMed Central journal article supplement (PMC5357787; doi:10.1038/srep44708), 2017-03-20

# **Transcription factor NF-kappa B represses ANT1 transcription and leads to mitochondrial dysfunctions**

Chen Zhang<sup>1</sup>, Hui Jiang<sup>4</sup>, Pin Wang<sup>2</sup>, Heng Liu<sup>2</sup>, Xiulian Sun<sup>3\*</sup>

**Figure 1. NF- $\kappa$ B represses ANT1 gene transcription and protein expression.**

Figure 1A

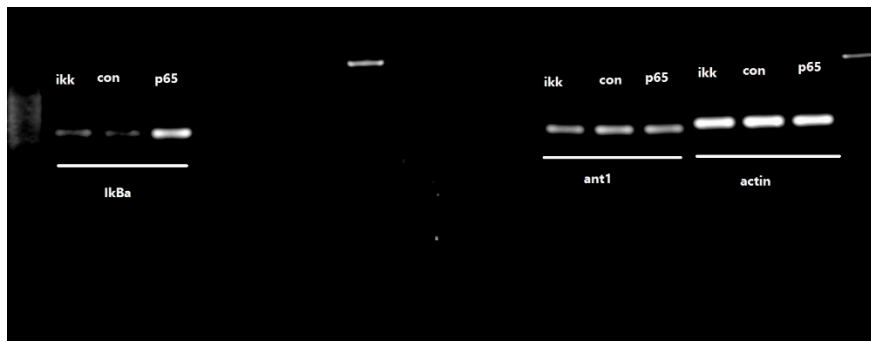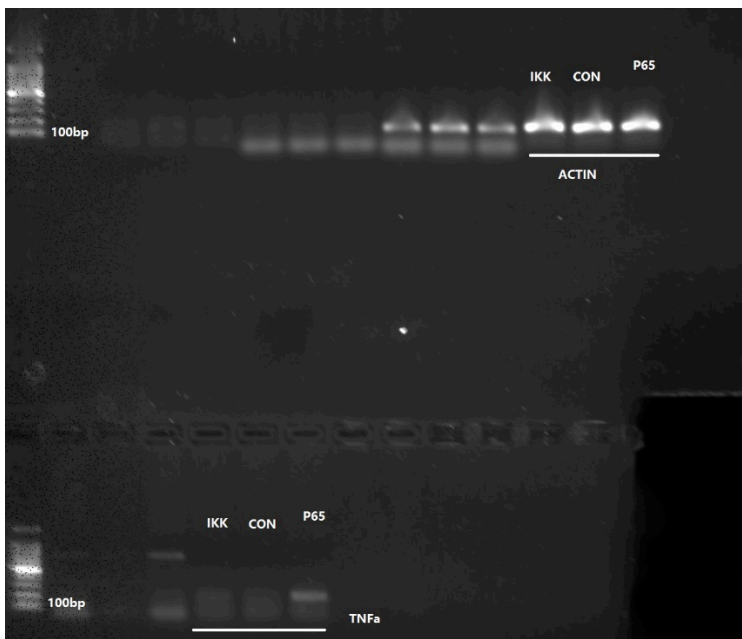

Figure 1B

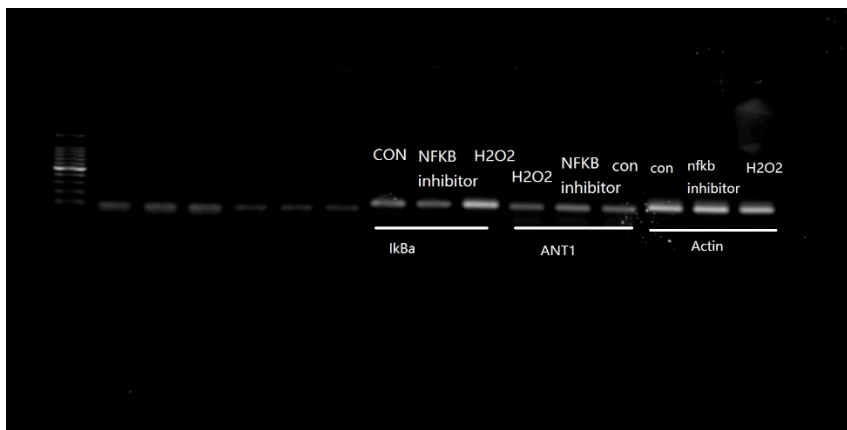

Figure 1C

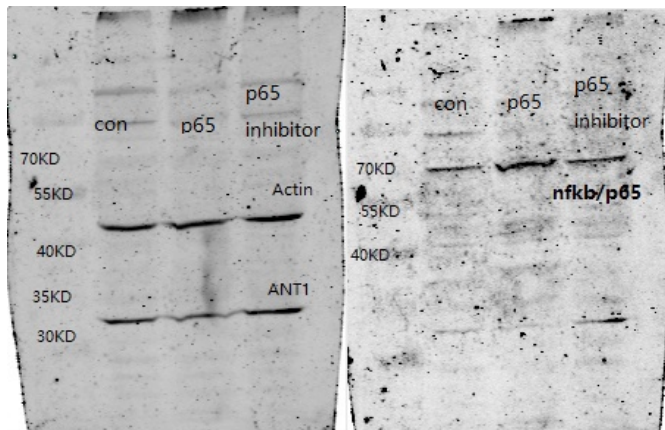

Figure 1D

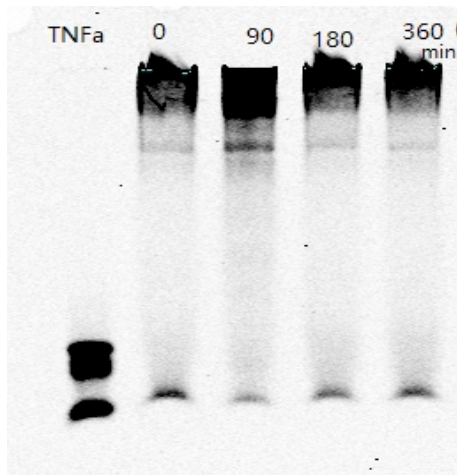

Figure 1E

| minutes | mRNA of ANTI1(% of con) |            |           |
|---------|-------------------------|------------|-----------|
| 0       | 99.832000               | 100.322200 | 99.322220 |
| 90      | 43.020010               | 48.263310  | 58.257160 |
| 180     | 80.809700               | 74.650890  | 78.035910 |
| 360     | 90.567910               | 88.058190  | 87.905360 |

| minutes | p65 activity (% of con) |            |
|---------|-------------------------|------------|
| 0       | 99.410040               | 100.590000 |
| 90      | 140.458000              | 137.177200 |
| 180     | 108.207600              | 106.959100 |
| 360     | 82.437390               | 81.470410  |

Figure 1 F

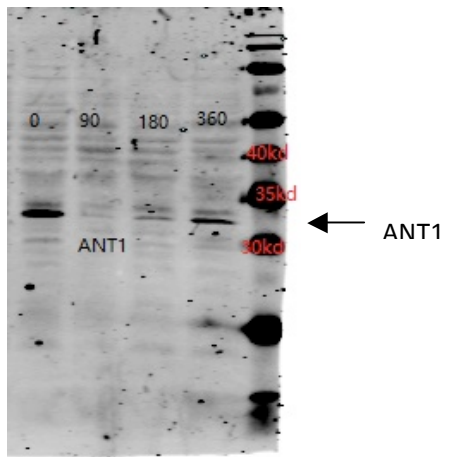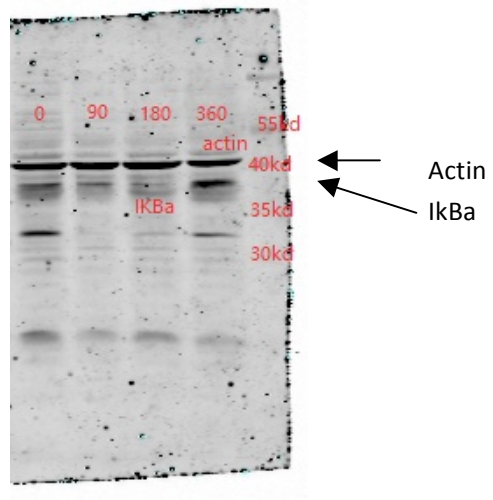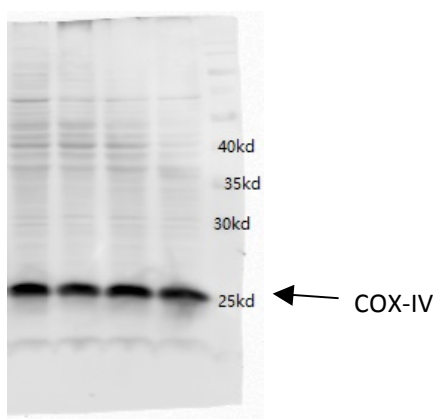

Figure 1G

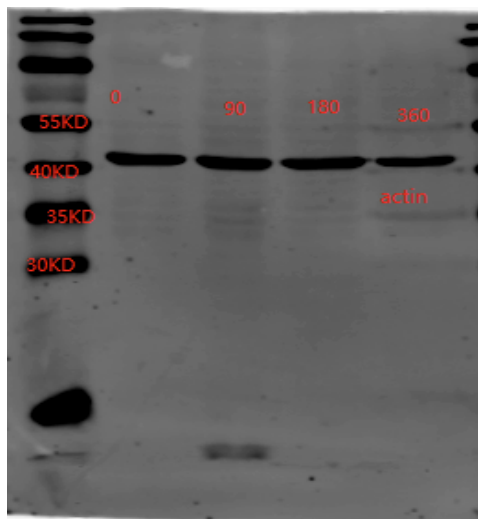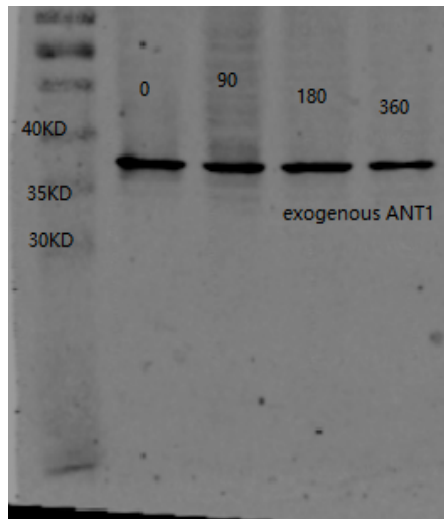

**Figure 2. NF- $\kappa$ B negatively regulates the *ANTI* promoter.**

Figure 2B

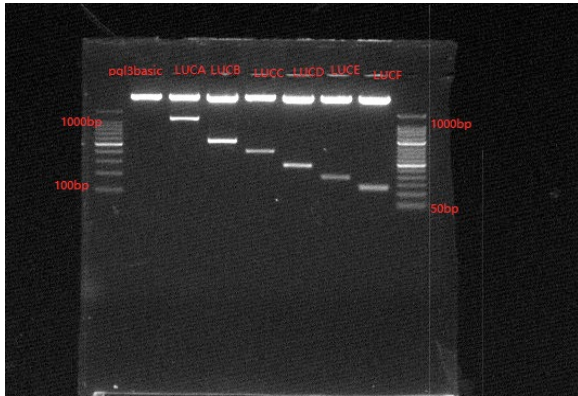

Figure 2C

|            | CON       |            |           |           | NFKB      |           |          |          |
|------------|-----------|------------|-----------|-----------|-----------|-----------|----------|----------|
| PGL3-BASIC | 0.2125667 | 0.1386833  | 0.120800  | 0.286300  | 0.2173457 | 0.1386833 | 0.120800 | 0.286300 |
| ANT-LUCA   | 18.347270 | 12.760230  | 9.689700  | 16.341600 | 6.391556  | 7.822747  | 7.799374 | 5.242778 |
| ANTLUC-B   | 24.215100 | 18.063400  | 11.826330 |           | 9.830753  | 14.578290 | 3.826989 |          |
| ANTLUC-C   | 10.498930 | 13.022200  | 10.498930 | 13.866830 | 2.265095  | 2.967806  | 2.265095 | 2.817522 |
| ANTLUC-D   | 11.742910 | 8.536300   | 9.599000  | 15.089450 | 2.440548  | 2.682487  | 2.635335 | 1.989928 |
| ANTLUC-E   | 9.130867  | 8.858268   | 12.825340 |           | 3.284943  | 5.739098  | 4.821162 |          |
| ANTLUC-F   | 3.318300  | 2.078000   | 4.123200  | 3.753700  | 3.825549  | 4.530502  | 3.724702 | 3.221441 |
| NF-KBLUC   | 0.145699  | 0.03734807 |           |           | 51.192490 | 48.512500 |          |          |

Figure 2D

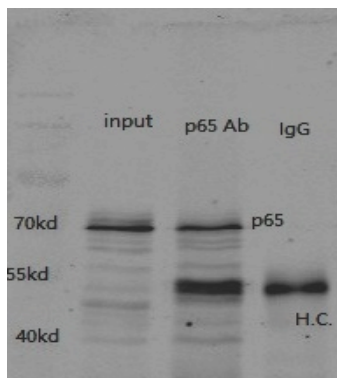

Figure 2 E

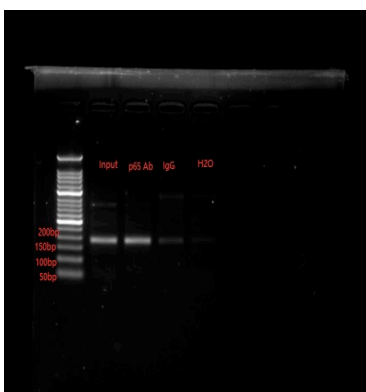

**Figure 3. Identification of the functional NRE site in *ANT1* gene promoter.**

Figure 3 B

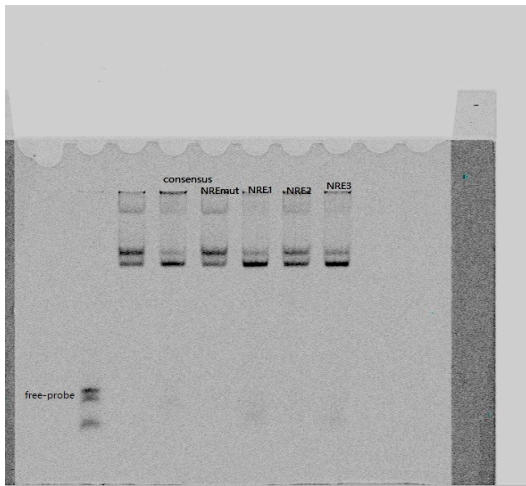

Figure 3 C

|      | basic      |          | ant1 luc  |           |           | AntNRE1m  |           |           |
|------|------------|----------|-----------|-----------|-----------|-----------|-----------|-----------|
| con  | 0.098500   | 0.067200 | 2.838133  | 2.916400  | 2.519400  | 2.750167  | 2.444900  | 2.660300  |
| nfkB | 0.08026316 | 0.080198 | 0.8723574 | 0.8210855 | 0.9162829 | 0.9819408 | 0.9567763 | 0.9792106 |

| AntNRE2m  |           |           | AntNRE1 and 2 m |          |
|-----------|-----------|-----------|-----------------|----------|
| 1.768633  | 1.646600  | 1.823600  | 2.316981        | 2.182201 |
| 0.7841009 | 0.7559211 | 0.8091776 | 2.586231        | 3.166899 |

Figure 3D

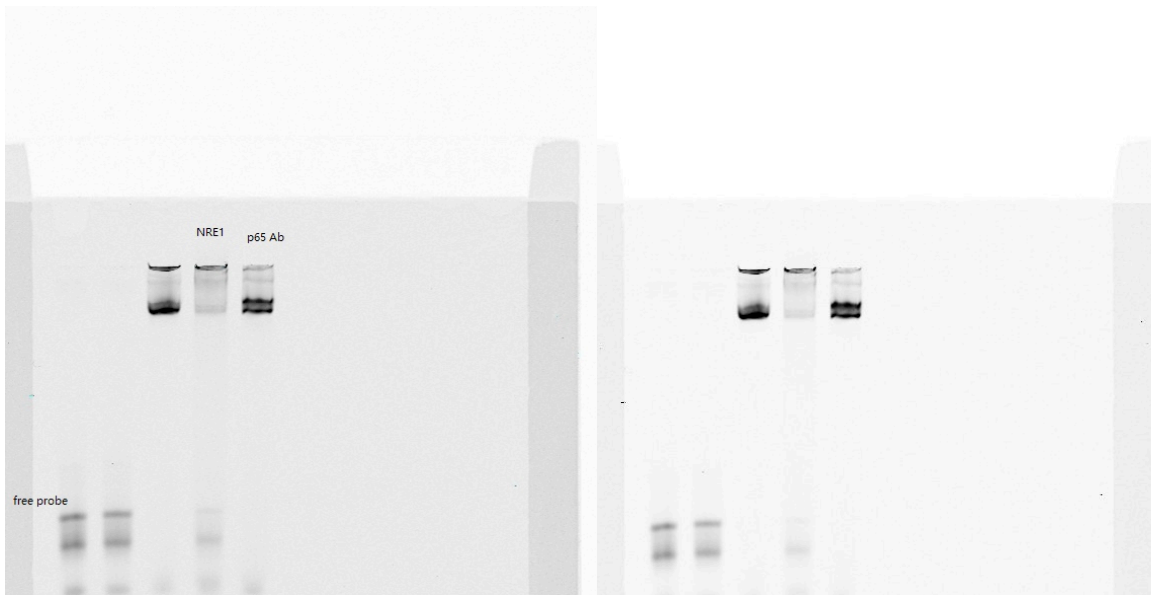

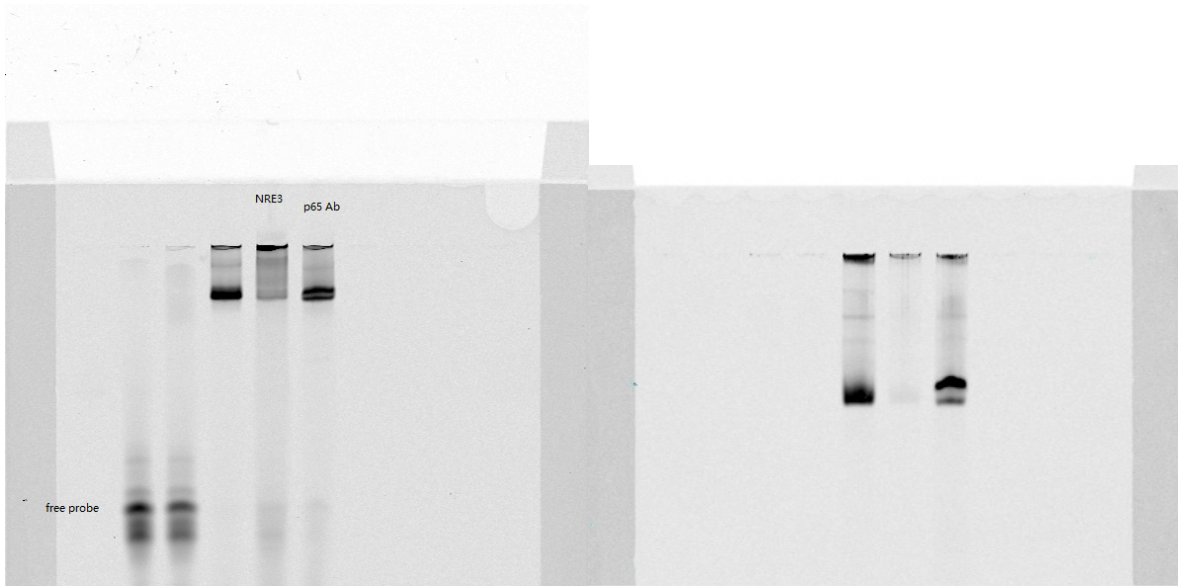

**Figure 4. NF-κB impairs mitochondrial ATP/ADP exchange rate and intracellular ATP level.**

Figure 4 A & 4B

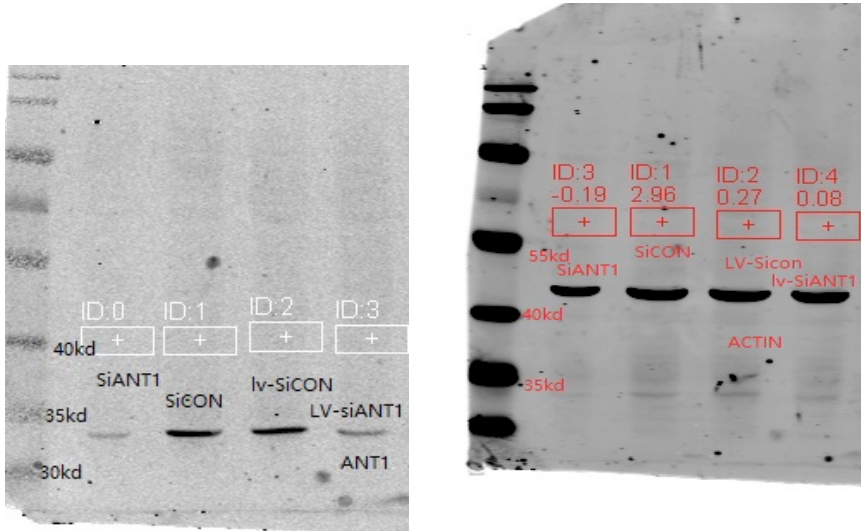

Figure 4 C

| time(s) | pbs       | tnfa      | sicon    | siant1    | con       | ant1      |
|---------|-----------|-----------|----------|-----------|-----------|-----------|
| 0.      | 0.276500  | 0.360000  | 0.312000 | 0.002430  | 0.099000  | 0.349000  |
| 2.      | 0.421000  | 0.383500  | 0.447000 | 0.009600  | 0.152000  | 0.456500  |
| 4.      | 0.493500  | 0.396500  | 0.558000 | 0.024100  | 0.164000  | 0.6348465 |
| 6.      | 0.624924  | 0.481000  | 0.636000 | 0.050500  | 0.194500  | 0.690824  |
| 8.      | 0.7988745 | 0.484000  | 0.653000 | 0.050500  | 0.408000  | 1.108207  |
| 10.     | 0.931041  | 0.4934854 | 0.725000 | 0.0533843 | 0.6784945 | 1.153605  |
| 12.     | 0.967359  | 0.5352125 | 0.871000 | 0.167500  | 0.7622925 | 1.214275  |
| 14.     | 1.042455  | 0.595345  | 0.880000 | 0.193000  | 0.7824445 | 1.264018  |
| 16.     | 1.043991  | 0.6002395 | 0.885000 | 0.276500  | 0.7916425 | 1.425709  |
| 18.     | 1.057489  | 0.670940  | 0.943000 | 0.296500  | 0.8223915 | 1.435380  |
| 20.     | 1.057812  | 0.683432  | 1.060000 | 0.305500  | 0.898827  | 1.438051  |
| 22.     | 1.113920  | 0.725688  | 1.240000 | 0.3475032 | 1.029155  | 1.552686  |
| 24.     | 1.164991  | 0.7894765 | 1.290000 | 0.390000  | 1.062766  | 1.560166  |
| 26.     | 1.184054  | 0.801534  | 1.350000 | 0.404500  | 1.112118  | 1.698272  |
| 28.     | 1.214275  | 0.810846  | 1.390000 | 0.443500  | 1.119665  | 1.698504  |
| 30.     | 1.273484  | 0.8202825 | 1.440000 | 0.446500  | 1.161162  | 1.740010  |
| 32.     | 1.310965  | 0.822494  | 1.440000 | 0.457500  | 1.195421  | 1.799705  |
| 34.     | 1.339325  | 0.832182  | 1.490000 | 0.478500  | 1.227142  | 1.909989  |
| 36.     | 1.351665  | 0.879223  | 1.500000 | 0.485500  | 1.390000  | 1.964965  |
| 38.     | 1.509447  | 0.889841  | 1.520000 | 0.497000  | 1.445000  | 2.062413  |
| 40.     | 1.560866  | 0.8981875 | 1.530000 | 0.510279  | 1.545000  | 2.105196  |
| 42.     | 1.576590  | 0.9435815 | 1.530000 | 0.517250  | 1.575000  | 2.308598  |
| 44.     | 1.617604  | 0.9527325 | 1.560000 | 0.5494745 | 1.580000  | 2.419562  |
| 46.     | 1.661979  | 1.005198  | 1.640000 | 0.584816  | 1.645000  | 2.453634  |
| 48.     | 1.749925  | 1.083135  | 1.690000 | 0.596498  | 1.855000  | 2.482224  |
| 50.     | 1.819980  | 1.136754  | 1.710000 | 0.624416  | 1.880000  | 2.554734  |
| 52.     | 1.850301  | 1.177052  | 1.750000 | 0.6492525 | 1.885000  | 2.632395  |
| 54.     | 1.858539  | 1.189593  | 1.810000 | 0.675436  | 1.955000  | 2.846791  |



|      |          |          |          |           |          |          |
|------|----------|----------|----------|-----------|----------|----------|
| 56.  | 1.864714 | 1.192062 | 1.850000 | 0.700719  | 2.015000 | 2.896856 |
| 58.  | 1.877512 | 1.224938 | 1.860000 | 0.709831  | 2.090000 | 2.983932 |
| 60.  | 1.920546 | 1.251119 | 1.900000 | 0.737515  | 2.126012 | 3.038430 |
| 62.  | 2.106021 | 1.261891 | 1.950000 | 0.7387475 | 2.142285 | 3.078340 |
| 64.  | 2.170628 | 1.314628 | 1.960000 | 0.765911  | 2.219531 | 3.092393 |
| 66.  | 2.279375 | 1.321464 | 2.010000 | 0.7719825 | 2.248430 | 3.124391 |
| 68.  | 2.529195 | 1.352468 | 2.020000 | 0.7779745 | 2.326253 | 3.132170 |
| 70.  | 2.579140 | 1.367162 | 2.030000 | 0.780048  | 2.511553 | 3.242995 |
| 72.  | 2.730661 | 1.400931 | 2.050000 | 0.835455  | 2.656154 | 3.347069 |
| 74.  | 2.845364 | 1.409221 | 2.060000 | 0.8420305 | 2.706593 | 3.351426 |
| 76.  | 2.965110 | 1.449785 | 2.060000 | 0.844782  | 2.765800 | 3.402659 |
| 78.  | 3.066736 | 1.452145 | 2.070000 | 0.8485265 | 2.770497 | 3.407072 |
| 80.  | 3.097731 | 1.535499 | 2.080000 | 0.8534915 | 2.844644 | 3.567547 |
| 82.  | 3.190224 | 1.547534 | 2.090000 | 0.905708  | 2.922116 | 3.603434 |
| 84.  | 3.410173 | 1.550248 | 2.090000 | 1.049649  | 2.967868 | 3.704027 |
| 86.  | 3.607660 | 1.564549 | 2.160000 | 1.108315  | 3.019881 | 3.731255 |
| 88.  | 3.614541 | 1.589664 | 2.170000 | 1.181201  | 3.026556 | 3.753982 |
| 90.  | 3.703892 | 1.596981 | 2.230000 | 1.212257  | 3.215570 | 4.073921 |
| 92.  | 3.783902 | 1.629093 | 2.240000 | 1.256297  | 3.337086 | 4.177380 |
| 94.  | 3.877075 | 1.630196 | 2.270000 | 1.266896  | 3.360915 | 4.701469 |
| 96.  | 3.892448 | 1.641292 | 2.340000 | 1.337473  | 3.435154 | 4.702245 |
| 98.  | 4.055562 | 1.650542 | 2.340000 | 1.413847  | 3.483841 | 4.718666 |
| 100. | 4.120077 | 1.662110 | 2.350000 | 1.477476  | 3.487393 | 4.886819 |
| 102. | 4.246793 | 1.680208 | 2.370000 | 1.493302  | 3.621829 | 4.915195 |
| 104. | 4.316838 | 1.705057 | 2.430000 | 1.566288  | 3.845033 | 4.927385 |
| 106. | 4.329782 | 1.733696 | 2.660000 | 1.566795  | 3.892255 | 5.127945 |
| 108. | 4.560615 | 1.743067 | 2.830000 | 1.600829  | 3.899092 | 5.140245 |
| 110. | 4.620308 | 1.860229 | 2.840000 | 1.610373  | 3.931779 | 5.144575 |
| 112. | 4.629973 | 1.862642 | 2.850000 | 1.646320  | 3.941417 | 5.203135 |
| 114. | 4.853141 | 1.883136 | 2.940000 | 1.656697  | 4.003627 | 5.489915 |
| 116. | 4.901331 | 1.991025 | 2.980000 | 1.669585  | 4.267840 | 5.500335 |
| 118. | 4.972956 | 2.075603 | 3.000000 | 1.702222  | 4.403863 | 5.539590 |
| 120. | 5.105695 | 2.101312 | 3.250000 | 1.790121  | 4.410164 | 5.809720 |
| 122. | 5.159095 | 2.106591 | 3.260000 | 1.799324  | 4.548236 | 5.910280 |
| 124. | 5.300880 | 2.167130 | 3.470000 | 1.800037  | 4.573589 | 5.923830 |
| 126. | 5.320730 | 2.252743 | 3.510000 | 1.828743  | 4.614141 | 5.989800 |
| 128. | 5.350830 | 2.300161 | 3.550000 | 1.832800  | 4.749402 | 5.991620 |
| 130. | 5.499955 | 2.391170 | 3.660000 | 1.842756  | 4.826302 | 6.391660 |
| 132. | 5.539905 | 2.479080 | 3.680000 | 1.845243  | 5.151925 | 6.397550 |
| 134. | 5.654155 | 2.520478 | 3.700000 | 1.862718  | 5.172985 | 6.483580 |
| 136. | 5.702615 | 2.529816 | 3.990000 | 1.870242  | 5.186985 | 6.640440 |
| 138. | 5.838165 | 2.545885 | 4.180000 | 1.915580  | 5.234555 | 6.662475 |
| 140. | 5.905760 | 2.611191 | 4.250000 | 1.917135  | 5.528470 | 6.851535 |
| 142. | 6.074785 | 2.738298 | 4.390000 | 1.937206  | 5.564385 | 7.127105 |
| 144. | 6.152595 | 2.760507 | 4.510000 | 1.937983  | 5.631305 | 7.201145 |

|      |          |          |          |          |          |           |
|------|----------|----------|----------|----------|----------|-----------|
| 146. | 6.197130 | 2.786197 | 4.580000 | 1.946242 | 5.805320 | 7.451165  |
| 148. | 6.204580 | 2.792769 | 4.810000 | 1.951182 | 5.839400 | 7.507995  |
| 150. | 6.264830 | 2.976338 | 4.890000 | 1.966272 | 5.866260 | 7.766135  |
| 152. | 6.450430 | 3.038193 | 4.940000 | 1.972613 | 5.870475 | 7.908175  |
| 154. | 6.587165 | 3.051906 | 5.200000 | 2.007231 | 6.060920 | 7.948610  |
| 156. | 6.700975 | 3.056530 | 5.480000 | 2.024579 | 6.130845 | 8.031280  |
| 158. | 6.731260 | 3.070339 | 5.610000 | 2.041275 | 6.245990 | 8.401640  |
| 160. | 6.769040 | 3.108697 | 5.630000 | 2.080203 | 6.290870 | 8.645835  |
| 162. | 6.879565 | 3.117079 | 5.700000 | 2.084398 | 6.317715 | 9.023235  |
| 164. | 7.100055 | 3.124515 | 5.720000 | 2.092434 | 6.425275 | 9.182860  |
| 166. | 7.149800 | 3.138598 | 5.820000 | 2.125650 | 6.476155 | 9.242085  |
| 168. | 7.160710 | 3.219981 | 6.150000 | 2.132897 | 6.506930 | 9.473830  |
| 170. | 7.315810 | 3.227811 | 6.400000 | 2.141533 | 6.549020 | 9.723635  |
| 172. | 7.410960 | 3.278339 | 6.490000 | 2.174984 | 6.701500 | 10.896470 |
| 174. | 7.461550 | 3.340383 | 6.630000 | 2.223389 | 6.873920 | 11.004650 |
| 176. | 7.486685 | 3.429838 | 6.680000 | 2.239305 | 6.875040 | 11.533840 |
| 178. | 7.669225 | 3.494483 | 6.710000 | 2.241656 | 6.985175 | 11.771970 |
| 180. | 7.846155 | 3.567809 | 6.880000 | 2.277431 | 7.029530 | 12.137370 |
| 182. | 8.070685 | 3.595835 | 6.960000 | 2.277845 | 7.084225 | 12.242440 |
| 184. | 8.176835 | 3.703107 | 7.230000 | 2.308507 | 7.121770 | 12.667310 |
| 186. | 8.192675 | 3.711419 | 7.700000 | 2.312500 | 7.125155 | 12.691820 |
| 188. | 8.377005 | 3.758111 | 7.710000 | 2.312982 | 7.146175 | 13.068380 |
| 190. | 8.464540 | 3.817218 | 7.740000 | 2.315527 | 7.193290 | 13.370540 |
| 192. | 8.525490 | 3.899935 | 7.760000 | 2.324193 | 7.262390 | 13.710060 |
| 194. | 8.538310 | 3.953311 | 7.830000 | 2.402988 | 7.268670 | 13.758920 |
| 196. | 8.956030 | 4.020369 | 8.040000 | 2.547287 | 7.291845 | 14.022340 |
| 198. | 8.963525 | 4.061947 | 8.100000 | 2.854898 | 7.339750 | 14.949600 |

Exchange rate (times of con)

| pbs       | tnfa      | sicon  | siant1    | con       | ant1     |
|-----------|-----------|--------|-----------|-----------|----------|
| 1.005917  | 0.7647059 | 1.0000 | 0.437500  | 0.9797918 | 1.375000 |
| 0.9467456 | 0.750000  | 1.0625 | 0.4117647 | 1.041029  | 2.058824 |
| 1.053254  | 0.7752809 | 1.0000 | 0.562500  | 0.9797918 | 1.587500 |

Figure 4D

ATP level in T98G(nM/10<sup>4</sup> cells)

| con      | siant1   | pbs      | tnfa     |
|----------|----------|----------|----------|
| 515.5289 | 191.2706 | 400.5951 | 237.2905 |
| 396.9066 | 200.646  | 347.3538 | 216.3816 |
| 390.887  | 156.5128 | 292.3562 | 166.1956 |
| 274.3893 | 148.6237 | 264.9036 | 124.9429 |
| 394.4279 |          | 326.3022 |          |

ATP level in T98G(times of con)

| con      | siant1   | pbs      | tnfa     |
|----------|----------|----------|----------|
| 1.308449 | 0.371018 | 1.228819 | 0.592345 |
| 1.007377 | 0.505524 | 1.065502 | 0.622943 |
| 0.992099 | 0.400404 | 0.896798 | 0.56847  |
| 0.696419 | 0.541653 | 0.812588 | 0.471654 |

Figure 4 E

ATP level in neuron (nM/10<sup>4</sup> cells)

| lv-sicon | lv-siant1 | pbs      | tnfa     |
|----------|-----------|----------|----------|
| 77.26735 | 44.3427   | 103.4948 | 78.79586 |
| 64.78874 | 39.44631  | 93.38913 | 69.27648 |
| 67.48053 | 27.03529  | 86.43686 | 43.90684 |
| 56.93962 | 23.99309  | 81.61415 | 40.94602 |
| 67.48053 | 27.03529  | 76.67759 | 39.00787 |

ATP level in neuron (times of con)

| lv-sicon | lv-siant1 | pbs      | tnfa     |
|----------|-----------|----------|----------|
| 1.15687  | 0.573887  | 1.176077 | 0.761351 |
| 0.970037 | 0.608845  | 1.06124  | 0.741805 |
| 1.010339 | 0.400638  | 0.982237 | 0.507964 |
| 0.852517 | 0.421378  | 0.927433 | 0.501703 |
| 1.010339 | 0.400638  | 0.871336 | 0.508726 |

Figure 4 F

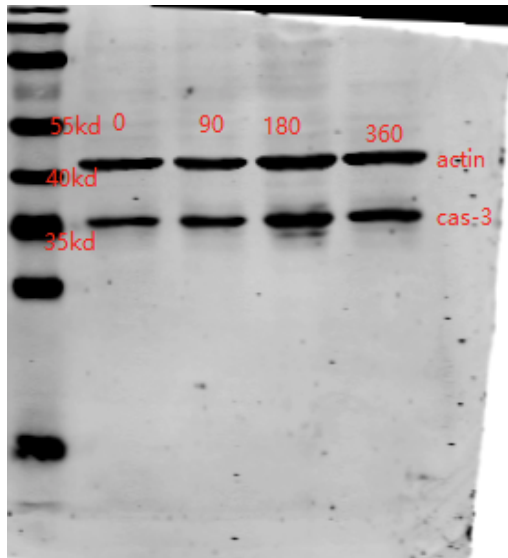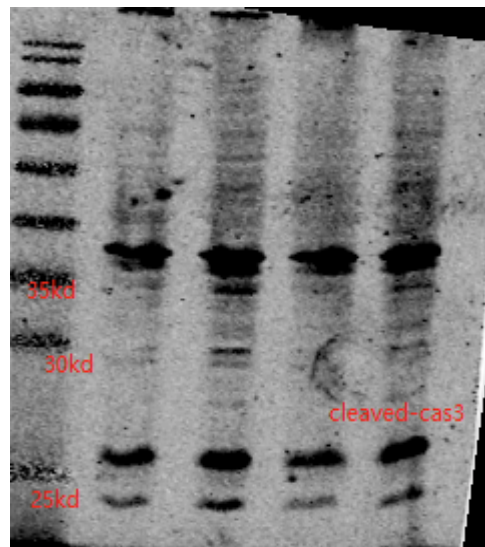

**Figure 5. NF- $\kappa$ B decreased Ca<sup>2+</sup>-induced mPTP opening, increased  $\Delta\psi_m$  and ROS.**

Figure 5A

mPTP opening of T98G(% of con)

|                    | pbs        |            |             |           |
|--------------------|------------|------------|-------------|-----------|
| 0um ionomycin      | 99.374925  | 99.4282458 | 99.5793213  | 100.91678 |
| 5um ionomycin      | 68.7857181 | 69.2188385 | 69.0753028  | 70.51375  |
| 5um ionomycin+bka  | 90.4900811 | 89.4649878 | 91.8190711  | 89.22635  |
| 5um ionomycin+catr | 57.8558646 | 57.376259  | 55.0638445  | 57.177    |
|                    | tnf        |            |             |           |
| 0um ionomycin      | 99.6298772 | 98.9076505 | 99.8144955  | 100.83162 |
| 5um ionomycin      | 79.1744633 | 79.753279  | 78.1536137  | 77.60367  |
| 5um ionomycin+bka  | 89.8088362 | 90.1559449 | 90.9570167  | 91.99262  |
| 5um ionomycin+catr | 68.745843  | 63.7093395 | 68.4697549  | 61.64629  |
|                    | sicon      |            |             |           |
| 0um ionomycin      | 99.8461202 | 99.4303825 | 99.2638251  | 101.09519 |
| 5um ionomycin      | 72.5472638 | 73.7458139 | 71.0546709  | 71.47954  |
| 5um ionomycin+bka  | 88.4357316 | 86.0143169 | 89.1396063  | 88.1068   |
| 5um ionomycin+catr | 56.4607801 | 57.7953876 | 57.0481819  | 54.23096  |
|                    | siant1     |            |             |           |
| 0um ionomycin      | 98.855949  | 98.2012748 | 100.5161473 | 101.2133  |
| 5um ionomycin      | 79.2252997 | 80.9036831 | 81.297288   | 80.2874   |
| 5um ionomycin+bka  | 83.3282665 | 82.021836  | 84.3977136  | 81.1082   |
| 5um ionomycin+catr | 71.7403765 | 75.3309259 | 69.4848702  | 71.25154  |

Figure 5 B

mPTP opening of neuron (% of con)

|                    | pbs      |          |          |          |
|--------------------|----------|----------|----------|----------|
| 0um ionomycin      | 99.29078 | 100.7092 |          |          |
| 5um ionomycin      | 71.14286 | 69.49296 | 68.98212 | 69.63169 |
| 5um ionomycin+bka  | 78.7156  | 80.42042 |          |          |
| 5um ionomycin+catr | 52.20317 | 54.89081 | 54.57143 | 56.26099 |
|                    | tnfa     |          |          |          |
| 0um ionomycin      | 98.95161 | 101.2903 |          |          |
| 5um ionomycin      | 72.27044 | 78.23129 | 73.22721 | 72.58993 |
| 5um ionomycin+bka  | 80.77947 | 82.75049 |          |          |
| 5um ionomycin+catr | 59.63734 | 61.93481 | 58.48303 | 57.45448 |
|                    | sicon    |          |          |          |
| 0um ionomycin      | 99.38462 | 100.6923 |          |          |
| 5um ionomycin      | 72.53844 | 70.75456 | 72.61514 | 69.80287 |
| 5um ionomycin+bka  | 85.29412 | 84.41558 |          |          |
| 5um ionomycin+catr | 52.99396 | 54.77292 | 52.46359 | 52.36025 |
|                    | siant1   |          |          |          |
| 0um ionomycin      | 100.0749 | 99.92    |          |          |
| 5um ionomycin      | 78.92562 | 77.3064  | 76.50367 | 74.8328  |
| 5um ionomycin+bka  | 90.41198 | 89.74551 |          |          |
| 5um ionomycin+catr | 68.98212 | 69.63169 | 66.27878 | 65.68751 |

Figure 5 C

| time(s) | sicon+catr  | siant+catr | sicon       | siant1   | sicon+bka | siant+bka |
|---------|-------------|------------|-------------|----------|-----------|-----------|
| 0       | 1           | 1          | 1           | 1        | 1         | 1         |
| 3       | 0.999247409 | 0.998673   | 0.997418849 | 0.995114 | 0.99878   | 0.999001  |
| 6       | 0.995692825 | 0.998638   | 0.984044324 | 0.994699 | 0.997526  | 0.998653  |
| 9       | 0.994476912 | 0.998552   | 0.981239838 | 0.992966 | 0.996046  | 0.997411  |
| 12      | 0.986183701 | 0.996755   | 0.970533409 | 0.992812 | 0.995677  | 0.996241  |
| 15      | 0.984502015 | 0.996748   | 0.96745619  | 0.989433 | 0.995515  | 0.994451  |
| 18      | 0.975757739 | 0.994936   | 0.961293394 | 0.985558 | 0.995215  | 0.991909  |
| 21      | 0.973232759 | 0.992775   | 0.959879574 | 0.981714 | 0.99401   | 0.990709  |
| 24      | 0.962539591 | 0.992248   | 0.954816218 | 0.977209 | 0.993607  | 0.99047   |
| 27      | 0.961277101 | 0.992212   | 0.944805122 | 0.972989 | 0.992815  | 0.990024  |
| 30      | 0.949860758 | 0.989887   | 0.944771835 | 0.968437 | 0.991925  | 0.98994   |
| 33      | 0.943707651 | 0.988789   | 0.934727452 | 0.963682 | 0.99159   | 0.989926  |
| 36      | 0.929947735 | 0.987056   | 0.933040899 | 0.959892 | 0.9892    | 0.989724  |
| 39      | 0.923333758 | 0.984745   | 0.930917914 | 0.955702 | 0.988197  | 0.989659  |
| 42      | 0.908014728 | 0.982884   | 0.914699798 | 0.952343 | 0.987292  | 0.989413  |
| 45      | 0.894112629 | 0.979617   | 0.91437405  | 0.94951  | 0.986726  | 0.988981  |
| 48      | 0.87258656  | 0.979353   | 0.903461499 | 0.947169 | 0.986662  | 0.987185  |
| 51      | 0.836677911 | 0.970161   | 0.895026346 | 0.945047 | 0.986028  | 0.985659  |
| 54      | 0.803426619 | 0.960668   | 0.890311575 | 0.943771 | 0.985836  | 0.985137  |
| 57      | 0.772501741 | 0.949457   | 0.88951435  | 0.942337 | 0.98378   | 0.984972  |
| 60      | 0.737610437 | 0.940378   | 0.888597113 | 0.940857 | 0.982984  | 0.984952  |
| 63      | 0.715491121 | 0.93008    | 0.887968477 | 0.939823 | 0.98292   | 0.984646  |
| 66      | 0.693715006 | 0.923383   | 0.887431279 | 0.938893 | 0.981848  | 0.984579  |
| 69      | 0.686115551 | 0.916529   | 0.886785498 | 0.937025 | 0.980185  | 0.984548  |
| 72      | 0.675581726 | 0.916208   | 0.88668263  | 0.935587 | 0.980126  | 0.982113  |
| 75      | 0.66757043  | 0.915816   | 0.875336777 | 0.934015 | 0.979698  | 0.979653  |
| 78      | 0.662991145 | 0.913727   | 0.874182373 | 0.931635 | 0.979246  | 0.979395  |
| 81      | 0.662689619 | 0.912821   | 0.874048074 | 0.930171 | 0.978371  | 0.977667  |
| 84      | 0.660377914 | 0.908934   | 0.873533735 | 0.927353 | 0.977908  | 0.977611  |
| 87      | 0.66013277  | 0.906595   | 0.863508018 | 0.925058 | 0.977662  | 0.976749  |
| 90      | 0.659272315 | 0.902744   | 0.863010824 | 0.922125 | 0.975951  | 0.974679  |
| 93      | 0.65846089  | 0.902629   | 0.862476483 | 0.919465 | 0.97301   | 0.972482  |
| 96      | 0.657497475 | 0.897737   | 0.862099302 | 0.916694 | 0.972479  | 0.96975   |
| 99      | 0.65721556  | 0.897209   | 0.860653439 | 0.914288 | 0.970831  | 0.969708  |
| 102     | 0.657051313 | 0.894478   | 0.85804077  | 0.911501 | 0.970605  | 0.968185  |
| 105     | 0.657031702 | 0.890655   | 0.850173389 | 0.908994 | 0.966936  | 0.966109  |
| 108     | 0.657002285 | 0.885292   | 0.850090524 | 0.906715 | 0.966041  | 0.964908  |
| 111     | 0.656901776 | 0.883723   | 0.850201107 | 0.904366 | 0.964935  | 0.964526  |
| 114     | 0.656838038 | 0.882311   | 0.849162209 | 0.902291 | 0.963184  | 0.964338  |
| 117     | 0.656708112 | 0.874787   | 0.848357781 | 0.901076 | 0.9622    | 0.963244  |

|     |             |          |             |          |          |          |
|-----|-------------|----------|-------------|----------|----------|----------|
| 120 | 0.656695855 | 0.870536 | 0.848253362 | 0.899058 | 0.958994 | 0.962894 |
| 123 | 0.656436003 | 0.870287 | 0.845536106 | 0.898039 | 0.95859  | 0.961623 |
| 126 | 0.656372265 | 0.868233 | 0.843355182 | 0.897144 | 0.958472 | 0.961244 |
| 129 | 0.656357557 | 0.864175 | 0.840616568 | 0.89586  | 0.958261 | 0.960164 |
| 132 | 0.656266854 | 0.863733 | 0.837512489 | 0.895172 | 0.95768  | 0.959538 |
| 135 | 0.656215373 | 0.860288 | 0.835519043 | 0.894414 | 0.957572 | 0.959241 |
| 138 | 0.656171248 | 0.854497 | 0.834045318 | 0.893649 | 0.957007 | 0.958994 |
| 141 | 0.656082996 | 0.853235 | 0.833703584 | 0.892873 | 0.956456 | 0.958921 |
| 144 | 0.656078093 | 0.849918 | 0.832334277 | 0.892016 | 0.955576 | 0.958739 |
| 147 | 0.655879527 | 0.843978 | 0.831102613 | 0.891554 | 0.954803 | 0.957502 |
| 150 | 0.655823144 | 0.835619 | 0.830226921 | 0.890686 | 0.954464 | 0.957339 |
| 153 | 0.655808435 | 0.830712 | 0.828658269 | 0.889152 | 0.953844 | 0.955995 |
| 156 | 0.655805983 | 0.824258 | 0.826311224 | 0.888418 | 0.953171 | 0.954548 |
| 159 | 0.655791275 | 0.823317 | 0.825594533 | 0.886692 | 0.952772 | 0.952514 |
| 162 | 0.655448074 | 0.822104 | 0.824692737 | 0.885558 | 0.952074 | 0.952348 |
| 165 | 0.655372079 | 0.821263 | 0.824472034 | 0.884105 | 0.951676 | 0.951683 |
| 168 | 0.655239702 | 0.819794 | 0.824412705 | 0.882356 | 0.95113  | 0.951417 |
| 171 | 0.65523725  | 0.817297 | 0.82352752  | 0.880219 | 0.950589 | 0.951254 |
| 174 | 0.65522009  | 0.816221 | 0.823425475 | 0.878012 | 0.949723 | 0.951131 |
| 177 | 0.655139193 | 0.815999 | 0.823325803 | 0.876425 | 0.949399 | 0.950937 |
| 180 | 0.655041135 | 0.814316 | 0.823003054 | 0.874518 | 0.948941 | 0.950556 |
| 183 | 0.654876889 | 0.812676 | 0.822015824 | 0.872219 | 0.948808 | 0.948303 |
| 186 | 0.654644002 | 0.812134 | 0.819936945 | 0.870378 | 0.948061 | 0.946996 |
| 189 | 0.654271384 | 0.811877 | 0.817675334 | 0.868103 | 0.947933 | 0.945658 |
| 192 | 0.65353105  | 0.811285 | 0.816033115 | 0.865792 | 0.947903 | 0.945273 |
| 195 | 0.652996637 | 0.810758 | 0.813951863 | 0.863617 | 0.947643 | 0.94478  |
| 198 | 0.652351909 | 0.810137 | 0.812452033 | 0.861456 | 0.947618 | 0.944763 |
| 201 | 0.651888587 | 0.804681 | 0.810470453 | 0.859753 | 0.947559 | 0.944653 |
| 204 | 0.65153558  | 0.804603 | 0.808977742 | 0.85817  | 0.947008 | 0.943649 |
| 207 | 0.651064904 | 0.797535 | 0.808004751 | 0.856651 | 0.946649 | 0.943315 |
| 210 | 0.651055098 | 0.789533 | 0.805444123 | 0.854537 | 0.946467 | 0.941548 |
| 213 | 0.650986458 | 0.779684 | 0.803963278 | 0.852973 | 0.946295 | 0.941234 |
| 216 | 0.650312313 | 0.770449 | 0.802356656 | 0.852473 | 0.946162 | 0.940465 |
| 219 | 0.649922535 | 0.769529 | 0.800028596 | 0.851032 | 0.945848 | 0.939693 |
| 222 | 0.649564625 | 0.768865 | 0.799117307 | 0.850094 | 0.945813 | 0.939281 |
| 225 | 0.649508242 | 0.767525 | 0.798602334 | 0.84939  | 0.945803 | 0.938428 |
| 228 | 0.649307224 | 0.766455 | 0.798398243 | 0.848137 | 0.945641 | 0.938193 |
| 231 | 0.649304772 | 0.766241 | 0.798372138 | 0.847414 | 0.945248 | 0.937617 |
| 234 | 0.648804679 | 0.765478 | 0.797954464 | 0.846515 | 0.944859 | 0.937511 |
| 237 | 0.648451672 | 0.764836 | 0.796051198 | 0.845992 | 0.944574 | 0.93642  |
| 240 | 0.64766231  | 0.76403  | 0.795512493 | 0.845296 | 0.944471 | 0.934588 |
| 243 | 0.647125445 | 0.762989 | 0.795303656 | 0.8452   | 0.944471 | 0.931723 |
| 246 | 0.64692933  | 0.76142  | 0.793476331 | 0.844601 | 0.944451 | 0.930164 |
| 249 | 0.646184093 | 0.760707 | 0.791770037 | 0.844235 | 0.944235 | 0.93004  |
| 252 | 0.645956109 | 0.760543 | 0.790984525 | 0.843897 | 0.944171 | 0.929656 |
| 255 | 0.645929144 | 0.760136 | 0.790255968 | 0.842821 | 0.943881 | 0.929476 |
| 258 | 0.645840892 | 0.757925 | 0.788843944 | 0.841718 | 0.943512 | 0.929403 |

|     |             |          |             |          |          |          |
|-----|-------------|----------|-------------|----------|----------|----------|
| 261 | 0.645835989 | 0.757726 | 0.786477914 | 0.841641 | 0.943084 | 0.929288 |
| 264 | 0.645823732 | 0.756485 | 0.783328745 | 0.840595 | 0.942828 | 0.928893 |
| 267 | 0.645642326 | 0.755836 | 0.782512382 | 0.840126 | 0.942749 | 0.92848  |
| 270 | 0.645554074 | 0.755172 | 0.781843154 | 0.839327 | 0.9427   | 0.927877 |
| 273 | 0.645306479 | 0.753475 | 0.7813353   | 0.838112 | 0.942464 | 0.92783  |
| 276 | 0.645196164 | 0.751371 | 0.780791849 | 0.837262 | 0.942041 | 0.927426 |
| 279 | 0.644852963 | 0.751364 | 0.775663473 | 0.836175 | 0.941825 | 0.927198 |
| 282 | 0.644772065 | 0.751236 | 0.773349653 | 0.835794 | 0.94181  | 0.926797 |
| 285 | 0.644757357 | 0.751171 | 0.771785747 | 0.835052 | 0.941702 | 0.926632 |
| 288 | 0.644526922 | 0.749988 | 0.770501874 | 0.834764 | 0.941535 | 0.926573 |
| 291 | 0.644495053 | 0.749695 | 0.76904476  | 0.833718 | 0.941303 | 0.926407 |
| 294 | 0.644345515 | 0.749467 | 0.767727662 | 0.832761 | 0.941205 | 0.926371 |
| 297 | 0.644213138 | 0.748283 | 0.765845755 | 0.832012 | 0.941161 | 0.926354 |
| 300 | 0.64399496  | 0.746907 | 0.765511141 | 0.830958 | 0.941141 | 0.926306 |
| 303 | 0.64390916  | 0.746792 | 0.763956728 | 0.82999  | 0.941122 | 0.926259 |
| 306 | 0.643842971 | 0.746379 | 0.76370992  | 0.828825 | 0.941107 | 0.925294 |
| 309 | 0.643570861 | 0.745673 | 0.763501083 | 0.827618 | 0.941028 | 0.92489  |
| 312 | 0.64356841  | 0.744838 | 0.763493964 | 0.826499 | 0.941023 | 0.924834 |
| 315 | 0.643404164 | 0.744303 | 0.763128499 | 0.825327 | 0.940748 | 0.924601 |
| 318 | 0.643190888 | 0.744254 | 0.760116973 | 0.825216 | 0.940605 | 0.924553 |
| 321 | 0.642185799 | 0.742078 | 0.759986449 | 0.825096 | 0.940403 | 0.924222 |
| 324 | 0.641950461 | 0.741921 | 0.759276878 | 0.825062 | 0.940394 | 0.923992 |
| 327 | 0.641945558 | 0.741444 | 0.758284901 | 0.824897 | 0.940349 | 0.923933 |
| 330 | 0.64193085  | 0.741116 | 0.758270662 | 0.824785 | 0.9403   | 0.923647 |
| 333 | 0.641859758 | 0.741016 | 0.757686868 | 0.824589 | 0.940212 | 0.923624 |
| 336 | 0.641702866 | 0.739875 | 0.757582449 | 0.824551 | 0.940069 | 0.922297 |
| 339 | 0.6416759   | 0.736573 | 0.756820668 | 0.824497 | 0.940059 | 0.922267 |
| 342 | 0.64157294  | 0.733863 | 0.753294168 | 0.824431 | 0.940025 | 0.922236 |
| 345 | 0.641536169 | 0.732543 | 0.751552277 | 0.824343 | 0.939489 | 0.921933 |
| 348 | 0.641472431 | 0.732486 | 0.75133632  | 0.824128 | 0.939346 | 0.921708 |
| 351 | 0.641403791 | 0.732294 | 0.750757272 | 0.824112 | 0.939081 | 0.921417 |
| 354 | 0.641376825 | 0.731858 | 0.750102283 | 0.823563 | 0.939012 | 0.921043 |
| 357 | 0.64128367  | 0.730311 | 0.749936162 | 0.823397 | 0.938899 | 0.921043 |
| 360 | 0.641099813 | 0.728521 | 0.749929043 | 0.823236 | 0.938874 | 0.921041 |
| 363 | 0.640825252 | 0.726082 | 0.749736818 | 0.823109 | 0.938741 | 0.920971 |
| 366 | 0.640700228 | 0.722452 | 0.749698847 | 0.823032 | 0.938525 | 0.920645 |
| 369 | 0.640673263 | 0.721853 | 0.749349994 | 0.822536 | 0.938461 | 0.920432 |
| 372 | 0.640643845 | 0.721603 | 0.748906216 | 0.822479 | 0.938294 | 0.920311 |
| 375 | 0.640619331 | 0.721574 | 0.748533631 | 0.822452 | 0.937974 | 0.920104 |
| 378 | 0.640403605 | 0.720854 | 0.748441078 | 0.82196  | 0.937025 | 0.919916 |
| 381 | 0.640141301 | 0.720405 | 0.748187151 | 0.821856 | 0.936346 | 0.91975  |
| 384 | 0.639503927 | 0.720341 | 0.747850164 | 0.82166  | 0.93614  | 0.919573 |
| 387 | 0.639334778 | 0.72007  | 0.746288632 | 0.821579 | 0.935884 | 0.919383 |
| 390 | 0.639315167 | 0.719763 | 0.745078326 | 0.821498 | 0.935608 | 0.918255 |
| 393 | 0.639192595 | 0.719756 | 0.744988146 | 0.821425 | 0.934389 | 0.917186 |
| 396 | 0.63899648  | 0.718978 | 0.744859996 | 0.821249 | 0.933922 | 0.915668 |
| 399 | 0.638766045 | 0.71895  | 0.74477219  | 0.821118 | 0.933922 | 0.912661 |

|     |             |          |             |          |          |          |
|-----|-------------|----------|-------------|----------|----------|----------|
| 402 | 0.638653279 | 0.718836 | 0.743896497 | 0.82091  | 0.933848 | 0.911848 |
| 405 | 0.638572381 | 0.718593 | 0.743882259 | 0.820891 | 0.933508 | 0.911435 |
| 408 | 0.638547867 | 0.718572 | 0.74386802  | 0.820472 | 0.933317 | 0.911284 |
| 411 | 0.638091899 | 0.718429 | 0.74364969  | 0.820407 | 0.93314  | 0.911258 |
| 414 | 0.63790559  | 0.718244 | 0.743305583 | 0.820203 | 0.932402 | 0.911236 |
| 417 | 0.637675155 | 0.718222 | 0.742740774 | 0.820176 | 0.932215 | 0.911216 |
| 420 | 0.637165256 | 0.718215 | 0.742050187 | 0.820153 | 0.932082 | 0.91063  |
| 423 | 0.63667742  | 0.717588 | 0.740329654 | 0.820042 | 0.931123 | 0.910549 |
| 426 | 0.636464145 | 0.716304 | 0.740156414 | 0.81983  | 0.930744 | 0.910439 |
| 429 | 0.635976309 | 0.715883 | 0.740142175 | 0.819665 | 0.930454 | 0.910229 |
| 432 | 0.635714006 | 0.715092 | 0.739809934 | 0.819619 | 0.930105 | 0.91019  |
| 435 | 0.635505633 | 0.715027 | 0.739800442 | 0.819388 | 0.930076 | 0.909553 |
| 438 | 0.635417382 | 0.713444 | 0.739743486 | 0.81925  | 0.929933 | 0.909539 |
| 441 | 0.635392867 | 0.71311  | 0.73965568  | 0.819223 | 0.929869 | 0.909168 |
| 444 | 0.635250684 | 0.712783 | 0.739465828 | 0.819207 | 0.92981  | 0.908433 |
| 447 | 0.63522617  | 0.711183 | 0.739451589 | 0.818923 | 0.929776 | 0.908349 |
| 450 | 0.635218815 | 0.709978 | 0.739425484 | 0.818908 | 0.929648 | 0.908229 |
| 453 | 0.635174689 | 0.706305 | 0.739214274 | 0.818596 | 0.929417 | 0.907735 |
| 456 | 0.635167335 | 0.705146 | 0.739192916 | 0.818489 | 0.929328 | 0.907432 |
| 459 | 0.635103598 | 0.705011 | 0.739102736 | 0.81845  | 0.929323 | 0.907362 |
| 462 | 0.635088889 | 0.703965 | 0.739088497 | 0.818408 | 0.929215 | 0.907219 |
| 465 | 0.635071729 | 0.702029 | 0.738704047 | 0.818204 | 0.928999 | 0.907168 |
| 468 | 0.634946706 | 0.701436 | 0.738476225 | 0.818177 | 0.928782 | 0.907123 |
| 471 | 0.63490258  | 0.700224 | 0.738381299 | 0.817877 | 0.928581 | 0.907017 |
| 474 | 0.634860905 | 0.699755 | 0.736734333 | 0.817731 | 0.928551 | 0.906952 |
| 477 | 0.634738334 | 0.698765 | 0.73596306  | 0.817689 | 0.927361 | 0.906565 |
| 480 | 0.634730979 | 0.698688 | 0.735953567 | 0.817482 | 0.927263 | 0.906203 |
| 483 | 0.634718722 | 0.698464 | 0.735861014 | 0.817297 | 0.926835 | 0.905976 |
| 486 | 0.634716271 | 0.698104 | 0.735524027 | 0.817243 | 0.925767 | 0.905743 |
| 489 | 0.634684402 | 0.697938 | 0.734247273 | 0.817189 | 0.925669 | 0.905611 |
| 492 | 0.634623116 | 0.697751 | 0.734149974 | 0.817143 | 0.925089 | 0.904946 |
| 495 | 0.634620665 | 0.697331 | 0.73398148  | 0.816905 | 0.92502  | 0.904879 |
| 498 | 0.634539767 | 0.69722  | 0.733922151 | 0.816886 | 0.92499  | 0.904677 |
| 501 | 0.634534864 | 0.696518 | 0.733879435 | 0.816736 | 0.922561 | 0.904383 |
| 504 | 0.634512801 | 0.696278 | 0.733127146 | 0.816578 | 0.922408 | 0.90397  |
| 507 | 0.634480933 | 0.695986 | 0.733096295 | 0.816544 | 0.921243 | 0.903883 |
| 510 | 0.634478481 | 0.695899 | 0.733044086 | 0.816405 | 0.920717 | 0.903858 |
| 513 | 0.634439258 | 0.695806 | 0.732794905 | 0.816401 | 0.918184 | 0.902865 |
| 516 | 0.634422098 | 0.695626 | 0.732728457 | 0.816148 | 0.918017 | 0.902211 |
| 519 | 0.634412292 | 0.695542 | 0.732683367 | 0.815802 | 0.917879 | 0.900421 |
| 522 | 0.634409841 | 0.695481 | 0.732683367 | 0.815702 | 0.916045 | 0.900082 |
| 525 | 0.634402487 | 0.695379 | 0.732626412 | 0.81556  | 0.91603  | 0.898991 |
| 528 | 0.63439023  | 0.695176 | 0.732583695 | 0.815452 | 0.915061 | 0.898205 |
| 531 | 0.634358361 | 0.694992 | 0.732462664 | 0.815406 | 0.914712 | 0.898169 |
| 534 | 0.634252949 | 0.694966 | 0.732424694 | 0.815306 | 0.912204 | 0.897838 |
| 537 | 0.634235789 | 0.694802 | 0.732334514 | 0.814921 | 0.910399 | 0.89779  |
| 540 | 0.634130377 | 0.69473  | 0.731767332 | 0.814564 | 0.908077 | 0.896769 |



|     |             |          |             |          |          |          |
|-----|-------------|----------|-------------|----------|----------|----------|
| 543 | 0.633948971 | 0.694193 | 0.731693764 | 0.814549 | 0.907797 | 0.896174 |
| 546 | 0.633944068 | 0.694038 | 0.730594996 | 0.814522 | 0.907654 | 0.896126 |
| 549 | 0.633907296 | 0.693751 | 0.727951308 | 0.81423  | 0.907197 | 0.896124 |
| 552 | 0.633890136 | 0.693489 | 0.72766653  | 0.813799 | 0.90703  | 0.896023 |
| 555 | 0.633887685 | 0.693372 | 0.726698285 | 0.813791 | 0.906961 | 0.89554  |
| 558 | 0.633872976 | 0.692771 | 0.725867683 | 0.81363  | 0.90551  | 0.895397 |
| 561 | 0.633831302 | 0.692572 | 0.72452448  | 0.813292 | 0.905259 | 0.89529  |
| 564 | 0.63381169  | 0.692076 | 0.724211225 | 0.813138 | 0.905048 | 0.895223 |
| 567 | 0.63381169  | 0.691982 | 0.723762699 | 0.8129   | 0.904679 | 0.895206 |
| 570 | 0.633784725 | 0.691666 | 0.72344707  | 0.81283  | 0.9043   | 0.895203 |
| 573 | 0.633762662 | 0.691456 | 0.723404354 | 0.81275  | 0.903405 | 0.895083 |
| 576 | 0.633728342 | 0.691283 | 0.723397234 | 0.812696 | 0.902825 | 0.894825 |
| 579 | 0.633676861 | 0.691199 | 0.723378249 | 0.812488 | 0.902613 | 0.894802 |
| 582 | 0.633664604 | 0.691089 | 0.723299935 | 0.812408 | 0.902023 | 0.894701 |
| 585 | 0.633659701 | 0.690924 | 0.723131442 | 0.812319 | 0.900036 | 0.893949 |
| 588 | 0.633603318 | 0.690544 | 0.72297956  | 0.812227 | 0.899033 | 0.893144 |
| 591 | 0.633603318 | 0.690433 | 0.722281854 | 0.81215  | 0.89714  | 0.892614 |
| 594 | 0.633544484 | 0.689994 | 0.722269988 | 0.811954 | 0.89652  | 0.892185 |
| 597 | 0.633441523 | 0.688175 | 0.721137996 | 0.811881 | 0.895256 | 0.892151 |

Figure 5 D

| TIME(S) | PBS+CATR  | TNFa+CATR | PBS      | TNFa     | PBS+BKA  | TNFa+BKA |
|---------|-----------|-----------|----------|----------|----------|----------|
| 0       | 1         | 1         | 0.996792 | 1        | 1        | 1        |
| 3       | 0.9939262 | 0.997419  | 0.995245 | 0.999793 | 0.998903 | 0.999783 |
| 6       | 0.9820486 | 0.99501   | 0.995218 | 0.99891  | 0.998588 | 0.999371 |
| 9       | 0.9805734 | 0.984144  | 0.989173 | 0.997987 | 0.99804  | 0.999252 |
| 12      | 0.9775365 | 0.983108  | 0.98368  | 0.996423 | 0.997664 | 0.999252 |
| 15      | 0.9696515 | 0.982564  | 0.977955 | 0.994469 | 0.99726  | 0.998929 |
| 18      | 0.9611918 | 0.979904  | 0.968507 | 0.991539 | 0.99691  | 0.998916 |
| 21      | 0.9588578 | 0.973199  | 0.96509  | 0.990458 | 0.996388 | 0.998649 |
| 24      | 0.9523303 | 0.969477  | 0.964341 | 0.98849  | 0.996054 | 0.998613 |
| 27      | 0.9428594 | 0.967692  | 0.962764 | 0.984691 | 0.994254 | 0.998587 |
| 30      | 0.9331219 | 0.967554  | 0.95964  | 0.980014 | 0.993856 | 0.998445 |
| 33      | 0.929846  | 0.967343  | 0.959586 | 0.979659 | 0.992496 | 0.998432 |
| 36      | 0.920434  | 0.966825  | 0.957229 | 0.973728 | 0.991267 | 0.998297 |
| 39      | 0.9176394 | 0.965432  | 0.956402 | 0.968385 | 0.990988 | 0.998218 |
| 42      | 0.9124036 | 0.962957  | 0.954054 | 0.968306 | 0.990937 | 0.998136 |
| 45      | 0.9083763 | 0.962207  | 0.953245 | 0.962687 | 0.99086  | 0.998024 |
| 48      | 0.9065029 | 0.961818  | 0.952794 | 0.957196 | 0.990533 | 0.997786 |
| 51      | 0.8937257 | 0.957704  | 0.952343 | 0.953269 | 0.98941  | 0.997444 |
| 54      | 0.8936426 | 0.956966  | 0.951623 | 0.951202 | 0.988961 | 0.996768 |
| 57      | 0.8934729 | 0.954022  | 0.951513 | 0.945291 | 0.98847  | 0.996403 |
| 60      | 0.8898785 | 0.950238  | 0.951489 | 0.944295 | 0.98787  | 0.996235 |
| 63      | 0.8874268 | 0.942161  | 0.948833 | 0.942168 | 0.987411 | 0.995846 |
| 66      | 0.8851447 | 0.931863  | 0.948726 | 0.939825 | 0.987218 | 0.995253 |

|     |           |          |          |          |          |          |
|-----|-----------|----------|----------|----------|----------|----------|
| 69  | 0.8829327 | 0.930085 | 0.94855  | 0.939613 | 0.987016 | 0.995042 |
| 72  | 0.882436  | 0.927123 | 0.945276 | 0.93945  | 0.98683  | 0.994957 |
| 75  | 0.8767043 | 0.924578 | 0.94461  | 0.939361 | 0.986112 | 0.994117 |
| 78  | 0.8709055 | 0.921165 | 0.943965 | 0.93902  | 0.984841 | 0.99273  |
| 81  | 0.8510176 | 0.912944 | 0.943675 | 0.938942 | 0.984722 | 0.992255 |
| 84  | 0.8450718 | 0.909473 | 0.942388 | 0.938493 | 0.984719 | 0.992213 |
| 87  | 0.8439152 | 0.905552 | 0.939757 | 0.938182 | 0.984572 | 0.990608 |
| 90  | 0.8424366 | 0.898786 | 0.939114 | 0.938172 | 0.984472 | 0.989413 |
| 93  | 0.8413943 | 0.898019 | 0.938494 | 0.937905 | 0.98443  | 0.988925 |
| 96  | 0.8382465 | 0.895638 | 0.938212 | 0.935207 | 0.983831 | 0.98826  |
| 99  | 0.8362312 | 0.894543 | 0.933347 | 0.934699 | 0.98343  | 0.98822  |
| 102 | 0.8356944 | 0.891553 | 0.928665 | 0.932705 | 0.983057 | 0.987808 |
| 105 | 0.8353447 | 0.89141  | 0.922963 | 0.929943 | 0.982708 | 0.987449 |
| 108 | 0.8347387 | 0.891363 | 0.918187 | 0.929331 | 0.982528 | 0.987311 |
| 111 | 0.8346452 | 0.890633 | 0.913353 | 0.92753  | 0.982178 | 0.987084 |
| 114 | 0.8344963 | 0.890342 | 0.90851  | 0.923415 | 0.981973 | 0.986632 |
| 117 | 0.8344824 | 0.889834 | 0.904154 | 0.921126 | 0.981954 | 0.986497 |
| 120 | 0.8332254 | 0.889823 | 0.899186 | 0.918122 | 0.981906 | 0.986099 |
| 123 | 0.8330938 | 0.889262 | 0.895036 | 0.913178 | 0.981854 | 0.98516  |
| 126 | 0.8329657 | 0.888961 | 0.891383 | 0.909226 | 0.9817   | 0.985022 |
| 129 | 0.8324366 | 0.887855 | 0.887756 | 0.906024 | 0.981681 | 0.983905 |
| 132 | 0.8318957 | 0.884093 | 0.883521 | 0.902186 | 0.981559 | 0.983681 |
| 135 | 0.8318576 | 0.882109 | 0.88006  | 0.898432 | 0.981543 | 0.982495 |
| 138 | 0.8308645 | 0.880252 | 0.876286 | 0.892353 | 0.981495 | 0.981454 |
| 141 | 0.8305763 | 0.875205 | 0.873129 | 0.892294 | 0.981383 | 0.981398 |
| 144 | 0.8303859 | 0.872158 | 0.869064 | 0.888712 | 0.981379 | 0.98124  |
| 147 | 0.8274875 | 0.867571 | 0.865737 | 0.885871 | 0.981238 | 0.980528 |
| 150 | 0.8269195 | 0.864925 | 0.863022 | 0.880345 | 0.981177 | 0.9801   |
| 153 | 0.8254998 | 0.86009  | 0.859673 | 0.875836 | 0.981043 | 0.979889 |
| 156 | 0.8253994 | 0.859037 | 0.856457 | 0.875702 | 0.980834 | 0.979254 |
| 159 | 0.8248107 | 0.858614 | 0.854145 | 0.871563 | 0.980799 | 0.97901  |
| 162 | 0.8235121 | 0.858127 | 0.85119  | 0.868011 | 0.980712 | 0.978796 |
| 165 | 0.8231831 | 0.855397 | 0.8489   | 0.865347 | 0.980613 | 0.978618 |
| 168 | 0.8214067 | 0.855312 | 0.845913 | 0.865144 | 0.9806   | 0.978041 |
| 171 | 0.8212647 | 0.855191 | 0.843154 | 0.862564 | 0.980568 | 0.977758 |
| 174 | 0.8207972 | 0.855042 | 0.840757 | 0.862179 | 0.980529 | 0.977725 |
| 177 | 0.8199627 | 0.850133 | 0.838297 | 0.858913 | 0.980417 | 0.977247 |
| 180 | 0.8191697 | 0.848313 | 0.835851 | 0.858746 | 0.980391 | 0.976533 |
| 183 | 0.8185948 | 0.847794 | 0.833248 | 0.856116 | 0.979945 | 0.976272 |
| 186 | 0.8079369 | 0.843123 | 0.830981 | 0.853452 | 0.979827 | 0.976203 |
| 189 | 0.7978157 | 0.842911 | 0.828468 | 0.853358 | 0.979737 | 0.974853 |
| 192 | 0.7968288 | 0.838033 | 0.826518 | 0.852312 | 0.97948  | 0.974559 |
| 195 | 0.7965795 | 0.833732 | 0.824112 | 0.852075 | 0.979073 | 0.974246 |
| 198 | 0.7962955 | 0.829515 | 0.821429 | 0.850329 | 0.978851 | 0.974009 |
| 201 | 0.7901752 | 0.827695 | 0.819645 | 0.850067 | 0.977398 | 0.973825 |
| 204 | 0.7898304 | 0.826991 | 0.817887 | 0.849845 | 0.9771   | 0.973555 |
| 207 | 0.7881176 | 0.826658 | 0.815325 | 0.849786 | 0.976926 | 0.973354 |

|     |           |          |          |          |          |          |
|-----|-----------|----------|----------|----------|----------|----------|
| 210 | 0.7867497 | 0.824833 | 0.813447 | 0.849727 | 0.97691  | 0.972428 |
| 213 | 0.7856659 | 0.823859 | 0.811399 | 0.849179 | 0.976551 | 0.971654 |
| 216 | 0.7847205 | 0.823552 | 0.809431 | 0.848977 | 0.976359 | 0.970277 |
| 219 | 0.7817812 | 0.822579 | 0.807736 | 0.848854 | 0.976096 | 0.969862 |
| 222 | 0.78092   | 0.822156 | 0.8058   | 0.848804 | 0.975387 | 0.969068 |
| 225 | 0.7807656 | 0.822119 | 0.804025 | 0.84879  | 0.975162 | 0.968913 |
| 228 | 0.7806378 | 0.821769 | 0.802343 | 0.848607 | 0.975117 | 0.968103 |
| 231 | 0.780065  | 0.821373 | 0.800836 | 0.848489 | 0.974899 | 0.967645 |
| 234 | 0.7799106 | 0.818103 | 0.798998 | 0.848484 | 0.974241 | 0.96748  |
| 237 | 0.7783385 | 0.815294 | 0.797058 | 0.848276 | 0.974001 | 0.967325 |
| 240 | 0.7765281 | 0.813161 | 0.795331 | 0.848158 | 0.97392  | 0.967279 |
| 243 | 0.7657066 | 0.809918 | 0.793601 | 0.847916 | 0.973872 | 0.966604 |
| 246 | 0.7568417 | 0.804405 | 0.792434 | 0.847906 | 0.97368  | 0.966472 |
| 249 | 0.7552627 | 0.79984  | 0.790783 | 0.847448 | 0.973506 | 0.966439 |
| 252 | 0.7544939 | 0.795787 | 0.789138 | 0.847216 | 0.973102 | 0.965306 |
| 255 | 0.753978  | 0.794771 | 0.78747  | 0.846111 | 0.973012 | 0.964891 |
| 258 | 0.753978  | 0.793168 | 0.785694 | 0.84581  | 0.972489 | 0.964255 |
| 261 | 0.7514431 | 0.792475 | 0.784612 | 0.845721 | 0.972409 | 0.963761 |
| 264 | 0.749168  | 0.791835 | 0.782783 | 0.845351 | 0.971906 | 0.963524 |
| 267 | 0.7489534 | 0.791189 | 0.781075 | 0.845129 | 0.971049 | 0.962964 |
| 270 | 0.7466921 | 0.789301 | 0.779649 | 0.844433 | 0.97103  | 0.962928 |
| 273 | 0.7452758 | 0.789195 | 0.778531 | 0.844034 | 0.970597 | 0.962216 |
| 276 | 0.7410788 | 0.788629 | 0.777055 | 0.843999 | 0.970289 | 0.961413 |
| 279 | 0.7331627 | 0.788613 | 0.775642 | 0.843555 | 0.970173 | 0.959739 |
| 282 | 0.732768  | 0.788317 | 0.774689 | 0.842993 | 0.970003 | 0.959472 |
| 285 | 0.7322797 | 0.788195 | 0.773298 | 0.842889 | 0.969839 | 0.958949 |
| 288 | 0.7318365 | 0.786486 | 0.77206  | 0.842771 | 0.968903 | 0.958925 |
| 291 | 0.7305725 | 0.786311 | 0.770741 | 0.842697 | 0.968765 | 0.958731 |
| 294 | 0.7282489 | 0.7861   | 0.769457 | 0.842499 | 0.968691 | 0.958659 |
| 297 | 0.7281416 | 0.78592  | 0.769028 | 0.842272 | 0.968354 | 0.958309 |
| 300 | 0.7275079 | 0.785475 | 0.768116 | 0.842134 | 0.968264 | 0.957894 |
| 303 | 0.7265729 | 0.785137 | 0.766752 | 0.841927 | 0.968258 | 0.957572 |
| 306 | 0.7265591 | 0.782306 | 0.765665 | 0.841813 | 0.968226 | 0.957147 |
| 309 | 0.7259011 | 0.781089 | 0.765088 | 0.841577 | 0.96786  | 0.957084 |
| 312 | 0.7258146 | 0.781021 | 0.763599 | 0.841103 | 0.967741 | 0.956942 |
| 315 | 0.7254752 | 0.779174 | 0.762651 | 0.840565 | 0.967446 | 0.956692 |
| 318 | 0.7239619 | 0.779058 | 0.761824 | 0.840388 | 0.967437 | 0.956564 |
| 321 | 0.7202186 | 0.778354 | 0.761256 | 0.840052 | 0.967177 | 0.956531 |
| 324 | 0.7195295 | 0.778307 | 0.759838 | 0.837802 | 0.967164 | 0.955915 |
| 327 | 0.7185564 | 0.778174 | 0.758854 | 0.837452 | 0.967045 | 0.955898 |
| 330 | 0.7168838 | 0.778074 | 0.758009 | 0.836658 | 0.966153 | 0.955641 |
| 333 | 0.7118142 | 0.77764  | 0.757584 | 0.835829 | 0.966031 | 0.955595 |
| 336 | 0.7092102 | 0.777582 | 0.756314 | 0.834477 | 0.965499 | 0.955341 |
| 339 | 0.7064295 | 0.777481 | 0.755867 | 0.833826 | 0.964995 | 0.955084 |
| 342 | 0.7063775 | 0.777116 | 0.754865 | 0.830969 | 0.964642 | 0.954399 |
| 345 | 0.7057923 | 0.776677 | 0.753837 | 0.830353 | 0.963959 | 0.954366 |
| 348 | 0.7045388 | 0.776312 | 0.752996 | 0.830224 | 0.963725 | 0.95292  |

|     |           |          |          |          |          |          |
|-----|-----------|----------|----------|----------|----------|----------|
| 351 | 0.7041405 | 0.775862 | 0.752312 | 0.830027 | 0.963612 | 0.952499 |
| 354 | 0.7035138 | 0.775841 | 0.751328 | 0.8298   | 0.962659 | 0.951827 |
| 357 | 0.7033233 | 0.775524 | 0.750827 | 0.829657 | 0.962582 | 0.951504 |
| 360 | 0.7030532 | 0.775153 | 0.750036 | 0.829588 | 0.962339 | 0.951201 |
| 363 | 0.7013633 | 0.774624 | 0.749454 | 0.828922 | 0.962223 | 0.951003 |
| 366 | 0.7000613 | 0.77455  | 0.748627 | 0.828907 | 0.962156 | 0.950891 |
| 369 | 0.6999332 | 0.774302 | 0.747357 | 0.828655 | 0.962056 | 0.950868 |
| 372 | 0.6990675 | 0.773915 | 0.747035 | 0.827215 | 0.96195  | 0.950588 |
| 375 | 0.6975438 | 0.773825 | 0.746212 | 0.826939 | 0.960879 | 0.950572 |
| 378 | 0.6970521 | 0.773751 | 0.745877 | 0.826795 | 0.960462 | 0.950509 |
| 381 | 0.6957985 | 0.773693 | 0.745331 | 0.826307 | 0.960398 | 0.950499 |
| 384 | 0.6957431 | 0.773085 | 0.744365 | 0.826134 | 0.960138 | 0.950206 |
| 387 | 0.6939736 | 0.772989 | 0.743967 | 0.825819 | 0.960074 | 0.950044 |
| 390 | 0.6920586 | 0.772915 | 0.743091 | 0.825725 | 0.959971 | 0.948575 |
| 393 | 0.6917712 | 0.77291  | 0.742572 | 0.825636 | 0.959868 | 0.947979 |
| 396 | 0.6913349 | 0.772894 | 0.741879 | 0.825602 | 0.959868 | 0.946391 |
| 399 | 0.6900363 | 0.772683 | 0.741186 | 0.825582 | 0.959451 | 0.946213 |
| 402 | 0.6892537 | 0.77264  | 0.740949 | 0.825384 | 0.959384 | 0.945265 |
| 405 | 0.6883672 | 0.772524 | 0.739853 | 0.825227 | 0.95906  | 0.944593 |
| 408 | 0.6874184 | 0.7719   | 0.739424 | 0.825009 | 0.958498 | 0.943743 |
| 411 | 0.6855034 | 0.771677 | 0.738556 | 0.824906 | 0.957898 | 0.94285  |
| 414 | 0.6817324 | 0.771376 | 0.738297 | 0.824797 | 0.9576   | 0.942781 |
| 417 | 0.6729991 | 0.771042 | 0.737921 | 0.823969 | 0.957449 | 0.94258  |
| 420 | 0.670485  | 0.770265 | 0.736987 | 0.82384  | 0.957257 | 0.942573 |
| 423 | 0.6614782 | 0.770074 | 0.736495 | 0.823668 | 0.956881 | 0.942214 |
| 426 | 0.6588602 | 0.768746 | 0.735793 | 0.823648 | 0.956262 | 0.941934 |
| 429 | 0.6571046 | 0.768482 | 0.735502 | 0.822977 | 0.955755 | 0.941539 |
| 432 | 0.6569764 | 0.768011 | 0.735216 | 0.822118 | 0.955473 | 0.94144  |
| 435 | 0.6563185 | 0.767762 | 0.734389 | 0.820633 | 0.955351 | 0.941299 |
| 438 | 0.6562042 | 0.767693 | 0.733982 | 0.819883 | 0.954985 | 0.940574 |
| 441 | 0.655477  | 0.767254 | 0.733548 | 0.819045 | 0.954738 | 0.940465 |
| 444 | 0.6550788 | 0.767143 | 0.732859 | 0.81904  | 0.954588 | 0.939978 |
| 447 | 0.6506879 | 0.766043 | 0.732506 | 0.818788 | 0.954575 | 0.93897  |
| 450 | 0.6498637 | 0.765598 | 0.732224 | 0.818685 | 0.954549 | 0.938475 |
| 453 | 0.6470969 | 0.764826 | 0.731862 | 0.818675 | 0.954469 | 0.937458 |
| 456 | 0.6468199 | 0.76354  | 0.731303 | 0.818561 | 0.954402 | 0.936743 |
| 459 | 0.6448461 | 0.762223 | 0.730901 | 0.818398 | 0.954347 | 0.936512 |
| 462 | 0.644479  | 0.761255 | 0.730427 | 0.818394 | 0.954138 | 0.936176 |
| 465 | 0.6443959 | 0.758276 | 0.730064 | 0.817979 | 0.954135 | 0.935731 |
| 468 | 0.6439146 | 0.757747 | 0.729523 | 0.817905 | 0.954039 | 0.935613 |
| 471 | 0.6435302 | 0.756647 | 0.729009 | 0.817811 | 0.953545 | 0.935537 |
| 474 | 0.6429311 | 0.756371 | 0.728553 | 0.817298 | 0.95308  | 0.935531 |
| 477 | 0.6425121 | 0.755911 | 0.728517 | 0.815833 | 0.952977 | 0.935405 |
| 480 | 0.6416083 | 0.755879 | 0.727994 | 0.814753 | 0.952942 | 0.935366 |
| 483 | 0.641307  | 0.755731 | 0.727529 | 0.814254 | 0.952765 | 0.93531  |
| 486 | 0.6409365 | 0.755186 | 0.727408 | 0.813682 | 0.952698 | 0.934865 |
| 489 | 0.6404067 | 0.755128 | 0.727082 | 0.813568 | 0.952461 | 0.93475  |

|     |           |          |          |          |          |          |
|-----|-----------|----------|----------|----------|----------|----------|
| 492 | 0.6403998 | 0.754652 | 0.727001 | 0.813415 | 0.952165 | 0.934733 |
| 495 | 0.6403617 | 0.754382 | 0.726286 | 0.812981 | 0.952027 | 0.934674 |
| 498 | 0.6371897 | 0.753848 | 0.726093 | 0.812769 | 0.951748 | 0.934621 |
| 501 | 0.6368642 | 0.753673 | 0.72583  | 0.812434 | 0.951668 | 0.934262 |
| 504 | 0.6341008 | 0.75252  | 0.725382 | 0.81198  | 0.951222 | 0.934111 |
| 507 | 0.6325806 | 0.751181 | 0.725324 | 0.81197  | 0.951193 | 0.934042 |
| 510 | 0.6305687 | 0.749816 | 0.725078 | 0.811763 | 0.949891 | 0.934022 |
| 513 | 0.629329  | 0.748927 | 0.724434 | 0.811634 | 0.949833 | 0.93392  |
| 516 | 0.6284945 | 0.748674 | 0.72392  | 0.811408 | 0.949628 | 0.933811 |
| 519 | 0.6283282 | 0.748398 | 0.723093 | 0.811102 | 0.949345 | 0.933643 |
| 522 | 0.6281828 | 0.747796 | 0.723039 | 0.811092 | 0.948733 | 0.933083 |
| 525 | 0.6270089 | 0.74779  | 0.722708 | 0.811087 | 0.94812  | 0.932872 |
| 528 | 0.6241313 | 0.747658 | 0.722605 | 0.810712 | 0.947831 | 0.93275  |
| 531 | 0.6215992 | 0.747631 | 0.721979 | 0.810643 | 0.947504 | 0.932124 |
| 534 | 0.6214122 | 0.746838 | 0.721979 | 0.8105   | 0.944495 | 0.931228 |
| 537 | 0.6205126 | 0.746806 | 0.721165 | 0.810436 | 0.943843 | 0.93106  |
| 540 | 0.6193622 | 0.746478 | 0.721031 | 0.810278 | 0.942704 | 0.929858 |
| 543 | 0.6189882 | 0.745944 | 0.720459 | 0.809686 | 0.94153  | 0.929127 |
| 546 | 0.6181453 | 0.745748 | 0.720441 | 0.809187 | 0.94076  | 0.929061 |
| 549 | 0.6167435 | 0.74533  | 0.720217 | 0.809138 | 0.94058  | 0.928995 |
| 552 | 0.6161825 | 0.74488  | 0.719806 | 0.808891 | 0.939028 | 0.928142 |
| 555 | 0.6157262 | 0.74424  | 0.719166 | 0.808803 | 0.93863  | 0.927974 |
| 558 | 0.6152476 | 0.743421 | 0.71888  | 0.808773 | 0.93811  | 0.927371 |
| 561 | 0.6132703 | 0.742986 | 0.718809 | 0.808753 | 0.937093 | 0.927081 |
| 564 | 0.6131248 | 0.742733 | 0.718683 | 0.808679 | 0.935374 | 0.927074 |
| 567 | 0.6131013 | 0.74159  | 0.717901 | 0.808255 | 0.933243 | 0.927055 |
| 570 | 0.6129379 | 0.741081 | 0.717879 | 0.808196 | 0.930754 | 0.926986 |
| 573 | 0.6118401 | 0.740071 | 0.717664 | 0.808181 | 0.93059  | 0.926729 |
| 576 | 0.611498  | 0.739659 | 0.717445 | 0.807762 | 0.930025 | 0.925895 |
| 579 | 0.6112757 | 0.739527 | 0.717422 | 0.807515 | 0.929583 | 0.924976 |
| 582 | 0.6111268 | 0.738463 | 0.717346 | 0.806992 | 0.928585 | 0.924614 |
| 585 | 0.6107355 | 0.734892 | 0.717337 | 0.80675  | 0.928508 | 0.924199 |
| 588 | 0.6104896 | 0.734299 | 0.71706  | 0.80673  | 0.928453 | 0.923922 |
| 591 | 0.6100568 | 0.734172 | 0.716971 | 0.806439 | 0.92665  | 0.92349  |
| 594 | 0.6100464 | 0.733395 | 0.716908 | 0.806281 | 0.92648  | 0.923319 |
| 597 | 0.6100083 | 0.731834 | 0.716863 | 0.806242 | 0.9264   | 0.923168 |

Figure 5 E

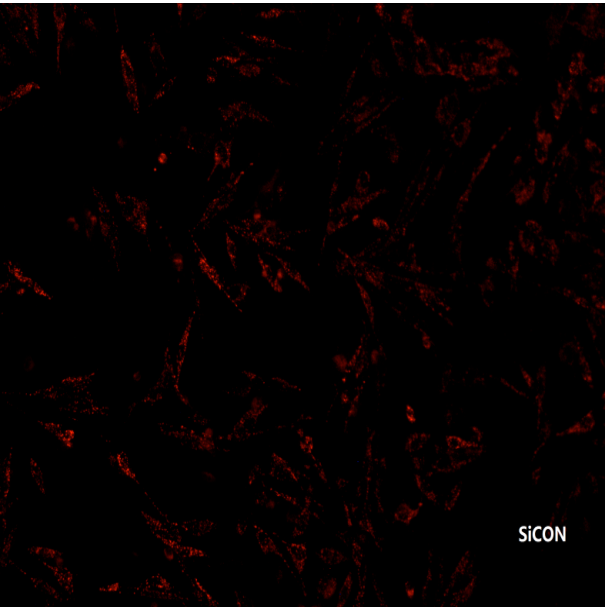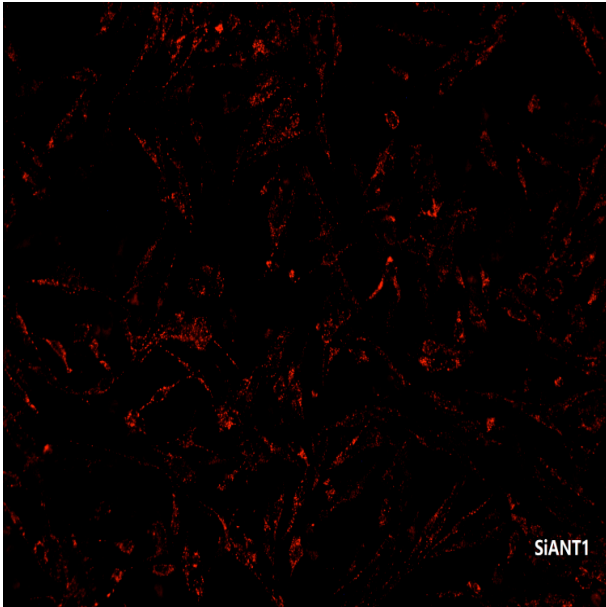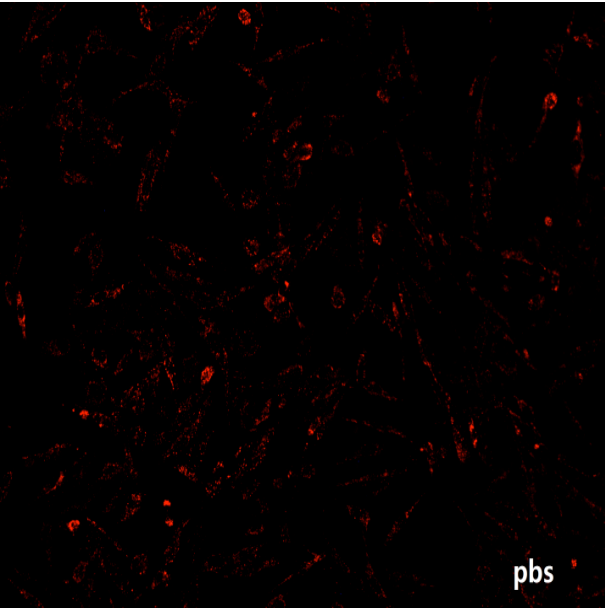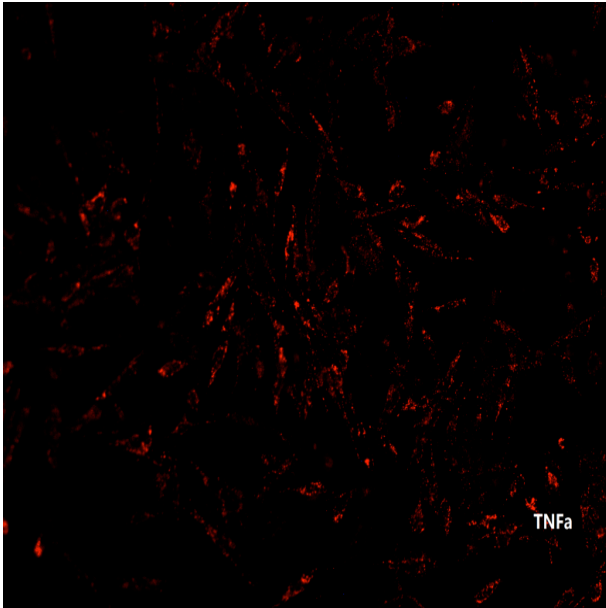

Figure 5 F

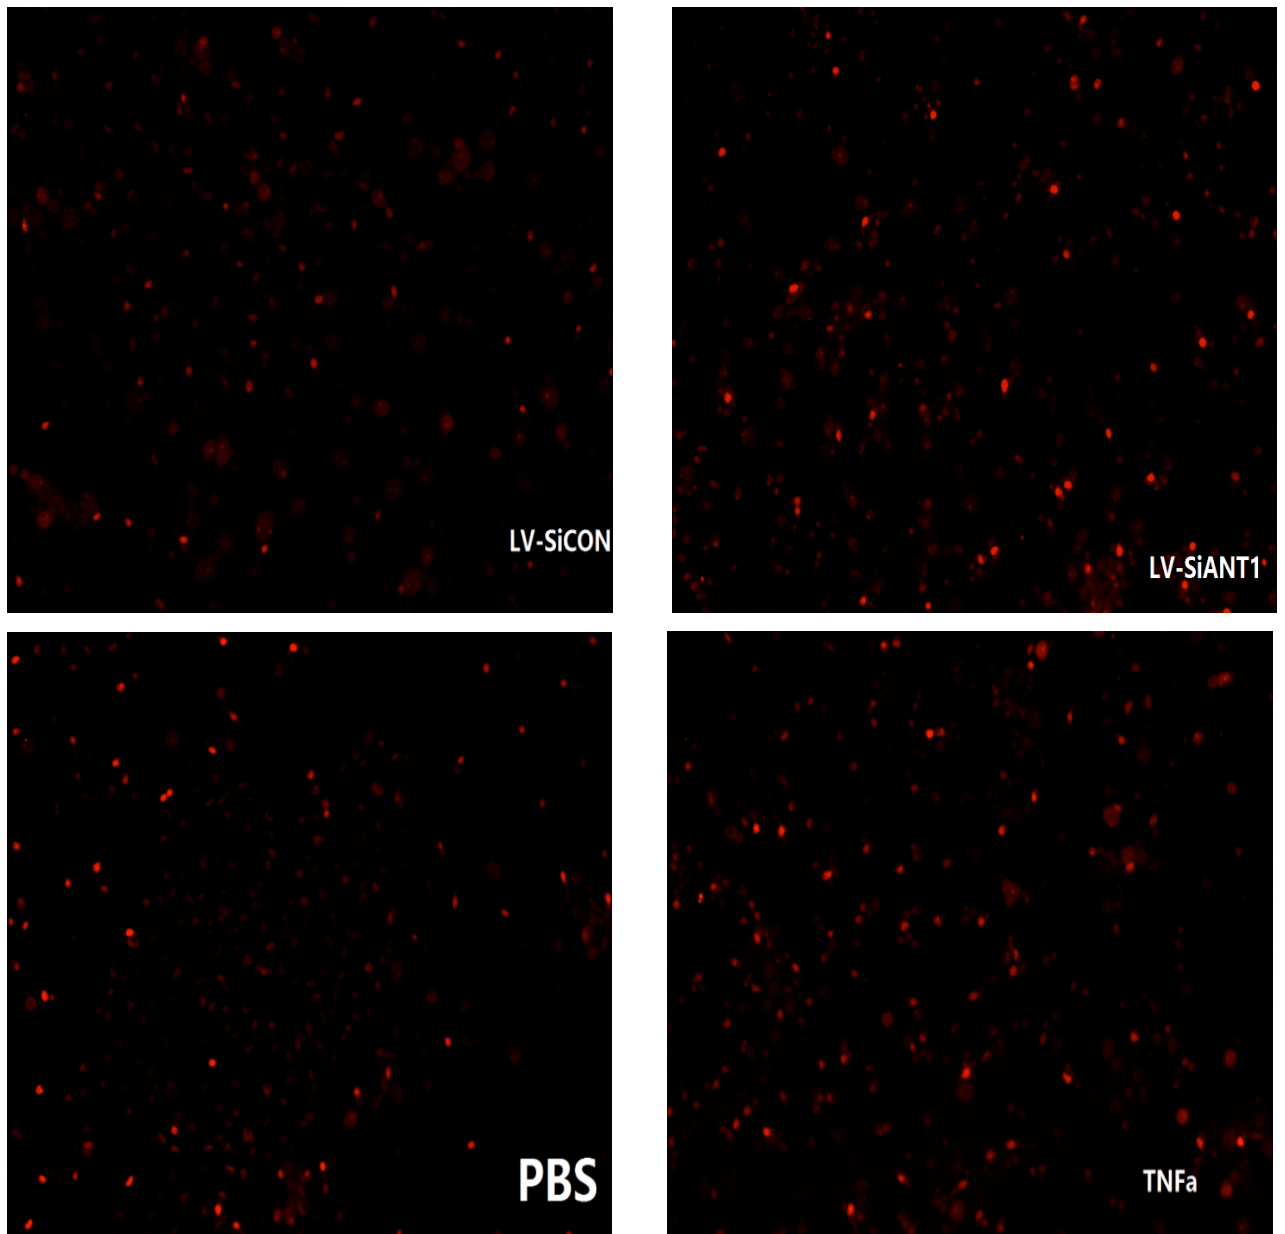

Figure 5 G  
SiCON

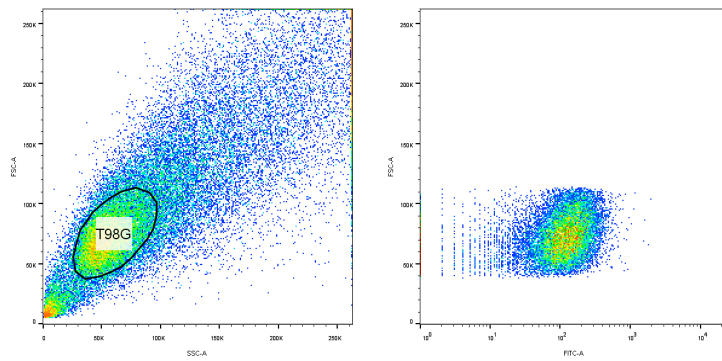

SiANT1

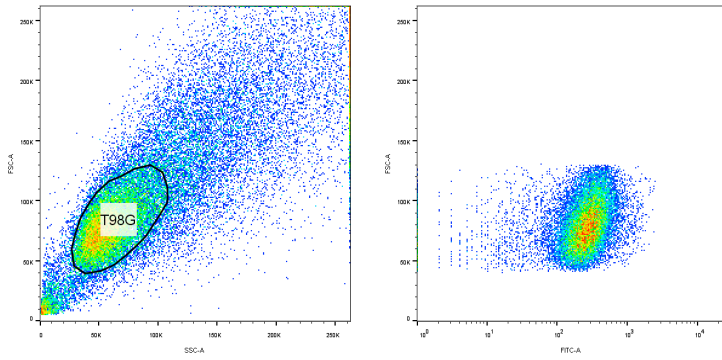

PBS

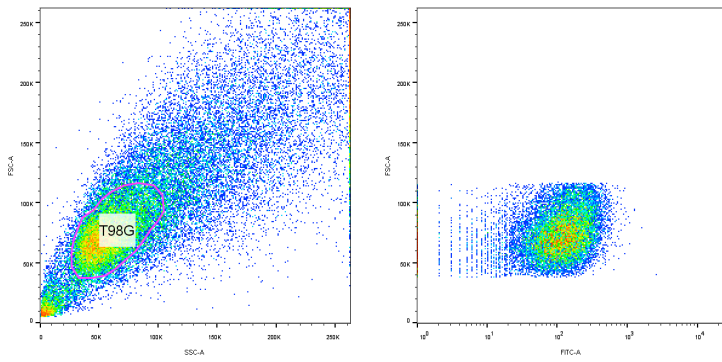

TNF $\alpha$

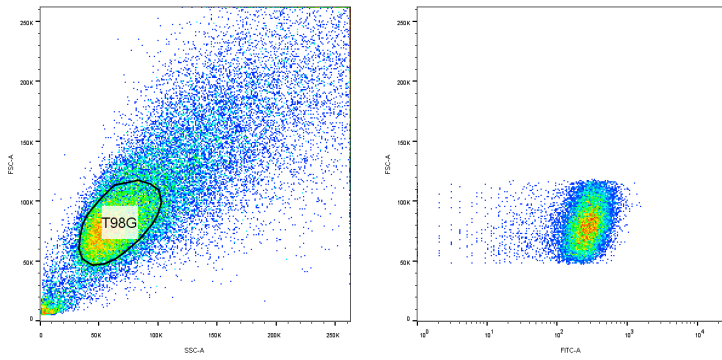

Figure 5 H

LV-SICON

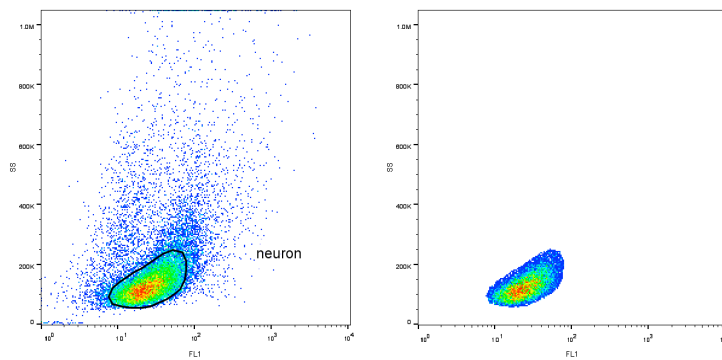



LV-SIANT1

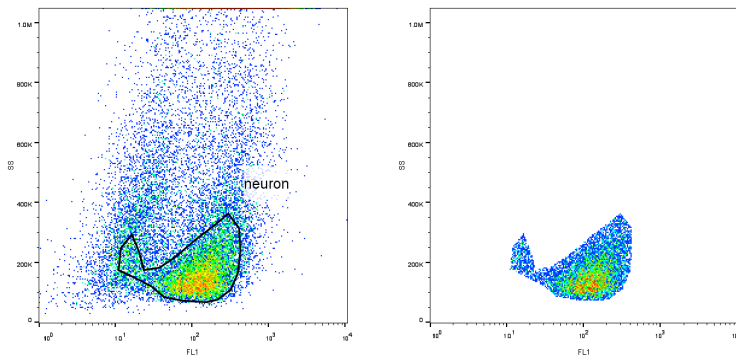

PBS

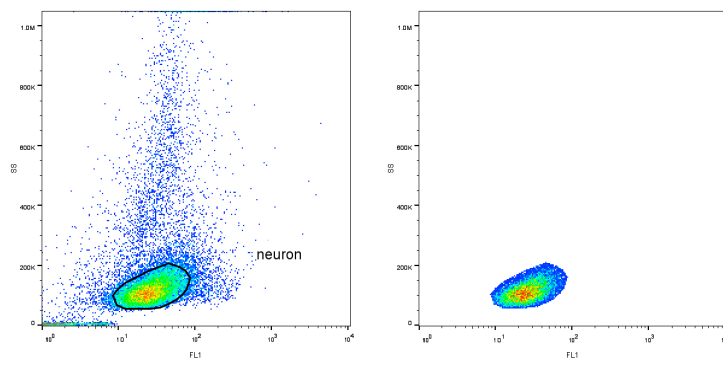

TNF $\alpha$

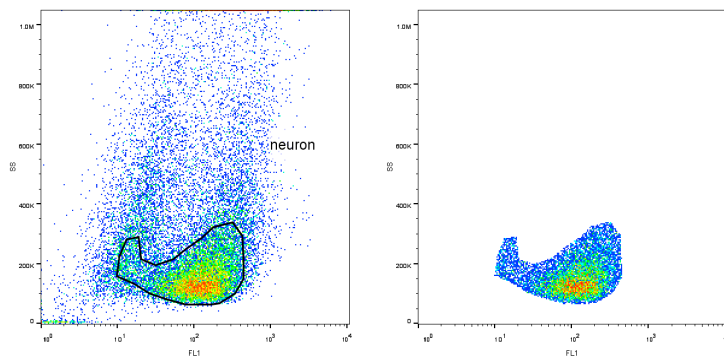

Figure 5 I

SiCON

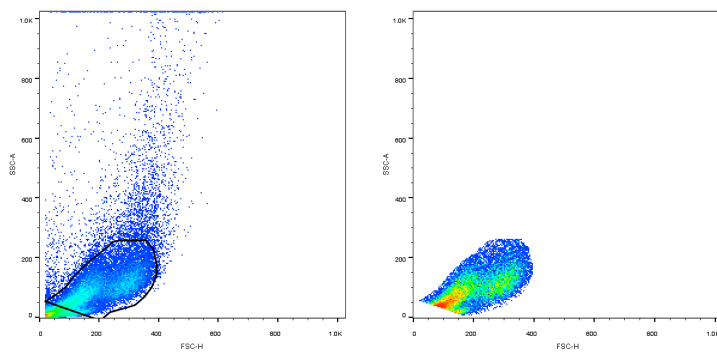

SiANT1

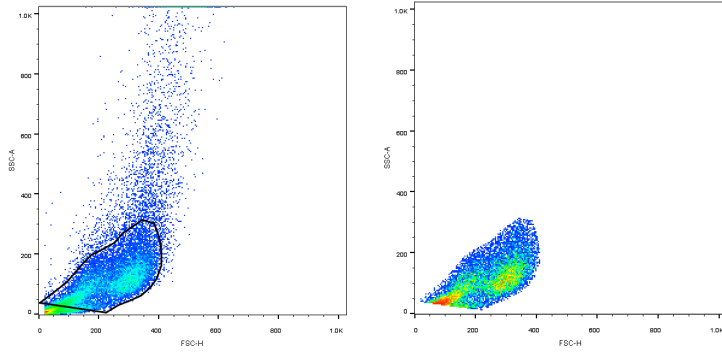

Figure 5 J  
PBS

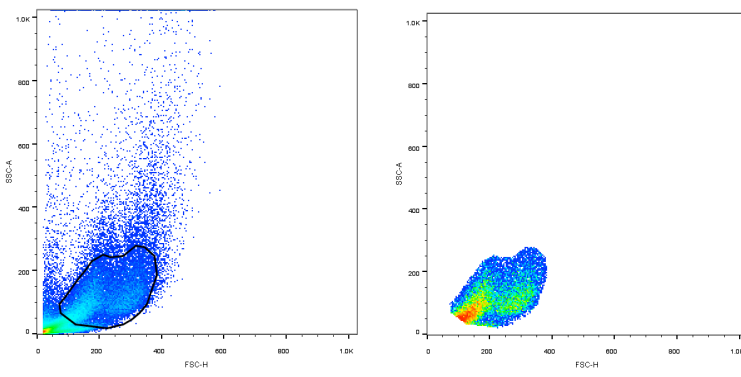

TNF $\alpha$

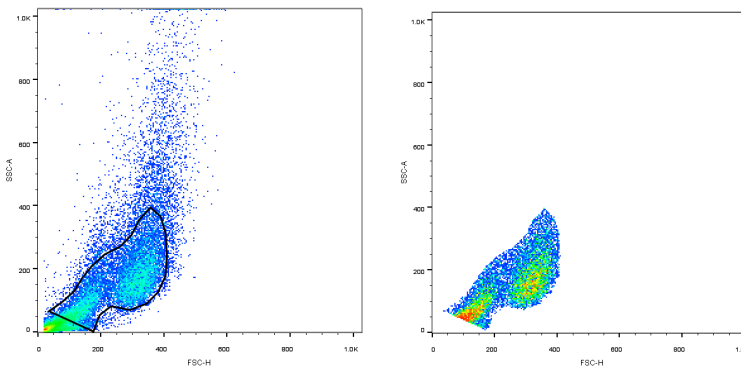

Supplement: srep44708-s1.pdf [file srep44708-s1.pdf]
